1     **The Sexual and Reproductive Health needs and preferences**  
2     **of youths in sub-Saharan Africa: A meta-synthesis**

3

4     **Authors**

5     Victoria Kalu Uka<sup>1</sup>, Helen White<sup>1</sup>, Debbie M. Smith<sup>2</sup>

6

7

8     **Institutional affiliations**

9     <sup>1</sup>Division of Nursing, Midwifery and Social Work, School of Health Sciences, Faculty of  
10    Biology Medicine and Health, University of Manchester, Manchester, United Kingdom.

11    <sup>2</sup>Division of Psychology and Mental Health and Manchester Centre for Health Psychology  
12    (MCHP), School of Health Sciences, Faculty of Biology Medicine and Health, University of  
13    Manchester, United Kingdom.

14

15    \* Corresponding author

16    E-mail: [victoria.uka@postgrad.manchester.ac.uk](mailto:victoria.uka@postgrad.manchester.ac.uk)

17

18

19

20

21

22

## 23 **Abstract**

24 The sexual and reproductive health (SRH) needs of youths in sub-Saharan Africa are not  
25 being fully met, as evidenced by high rates of unintended pregnancies and sexually  
26 transmitted infections in this population. Understanding service needs and preferences of  
27 sub-Saharan African youths aged 10-24 years is critical for improving access and SRH  
28 outcomes and the focus of this systematic review of qualitative research. Four databases  
29 were searched with key words to identify relevant studies, supplemented by citation search,  
30 with an update in June 2023. The eligibility criteria were clear and developed a priori.  
31 Twenty included studies from seven countries underwent quality appraisal using CASP. A  
32 meta-ethnographic approach was used to synthesise concepts across studies by the  
33 researchers. Four key themes were generated: *information needs; service needs; social*  
34 *needs; and delivery preferences*. Information needs encompassed desires for age-  
35 appropriate education on contraception, safer sex, bodily changes, and healthy relationships  
36 to fill knowledge gaps. Social needs consisted of life skills training, vocational development,  
37 substance use rehabilitation, and support systems to foster healthy behaviours. Service  
38 needs included accessible youth-friendly sexual health services, preventative care, sexually  
39 transmitted Infections (STI) management, and contraception; and delivery preferences  
40 including competent providers who maintain privacy and confidentiality, convenient youth-  
41 oriented settings, free or low-cost provisions, and youth involvement in service design. In  
42 conclusion, the identified themes emphasise the diverse nature of SRH needs and  
43 preferences among sub-Saharan African youths. Insights from their unique priorities and  
44 unmet needs inform policy development and intervention strategies. Tailored awareness  
45 campaigns, youth-centred training for providers, youth-friendly and confidential SRH  
46 models, comprehensive education, and engaging youth in developing relevant solutions

47 may improve acceptability, access, and health outcomes. These efforts could address  
48 barriers around stigma, costs, and lack of knowledge, contributing to enhanced SRH and  
49 wellbeing. Fulfilling youth SRH needs in sub-Saharan Africa requires commitment across  
50 sectors to evidence-based, youth-focused strategies placing their perspectives at the centre.

51

52

## 53 **Introduction**

54 According to World Health Organisation (WHO), youth are defined as those aged 10-24  
55 years [1]. Youths make up a large portion of the population in sub-Saharan Africa (SSA) and  
56 are critical to nation-building [2, 3]. However, access to sexual and reproductive health  
57 services (SRHS) is restricted, including religious, social, economic, and political barriers [4].  
58 As a result, there are inconsistencies in youth SRHS access across SSA [5–8]. While political  
59 leaders in sub-Saharan Africa may embrace international support and funding for youth  
60 sexual and reproductive health services (SRHS), actual implementation within these  
61 countries often face challenges [9–12]. Over 374 million new cases of Sexually transmitted  
62 infections (STIs) occur yearly, predominantly among youth aged 15-24 years in low- and  
63 middle-income countries [13–14]. Approximately 1.5 million HIV-positive youth reside in SSA  
64 [15]. Moreover, gender inequality exists with many females having unmet contraception  
65 needs as intimate partner violence prevents them from negotiating safer sex [16]. Twenty-  
66 one million pregnancies occur yearly among 15-19-year-olds in low- and middle-income  
67 countries, half of which are unplanned [13, 14] and for many lead to increased female  
68 school dropout rates [17, 18]. With abortion still illegal in some countries in SSA, including  
69 Nigeria, unintended pregnancy raises the vulnerability of young females to unsafe options

70 and complications [19]. Such situations strain youths emotionally and psychologically [20],  
71 lowering self-esteem and disconnecting them from more empowered peers [21]. Healthy  
72 development is hindered [22] and potentially leads to substance misuse or mental health  
73 issues [23]. A lack of access to SRHS exacerbates health problems [4], increasing adverse  
74 outcomes like illness and death [24].

75 When appropriate SRHS are available, including family planning and abortion services, youth  
76 vulnerabilities to unintended pregnancy and STIs can be reduced [25–28]. SRHS designed  
77 based on youth needs and preferences will promote usage [4]. The WHO, in collaboration  
78 with the Joint United Nations Programme on HIV/AIDS (UNAIDS) recommend youth  
79 participation in healthcare design and delivery, given their awareness of personal needs, to  
80 develop relevant solutions [14]. Ignoring youth perspectives risks service refusal and may  
81 stall progress towards quality sexual and reproductive health services [5, 14]. The current  
82 review explored the needs and preferences of youths of SRHS in SSA, with the aim to  
83 increase access.

84

## 85 **Methods**

86 This review employed a systematic approach. The revised Preferred Reporting Items for  
87 Systematic Review and Meta-analysis (PRISMA) standards were followed to guide the  
88 identification and selection of relevant literature [29]. This review protocol was registered  
89 on PROSPERO (CRD42022307530). No amendments were made to the protocol.

90

91

## 92 **Search strategy**

93 The review question and search terms were structured according to the Joanna Briggs  
94 Institute's (JBI) suggested framework: PICo, which represents Participants, Phenomena of  
95 interest, and Context [30] (Fig 1). An initial scoping search was conducted in Ovid Medline to  
96 refine the review question and search terms. During the systematic search, medical subject  
97 headings (MeSH) were used in different databases to broaden the search terms [31]. The  
98 following four databases were searched: "Medical Literature Analysis and Retrieval System"  
99 (Ovid Medline), "Cumulative Index to Nursing and Allied Health Literature" (CINAHL plus),  
100 Psychological Information Database (PsycINFO), and Allied and Complementary Medicine  
101 Database (AMED). A citation search to identify additional relevant studies was also  
102 conducted. The S2 file presents the full search history on Ovid Medline, CINAHL plus and  
103 PsycINFO.

104

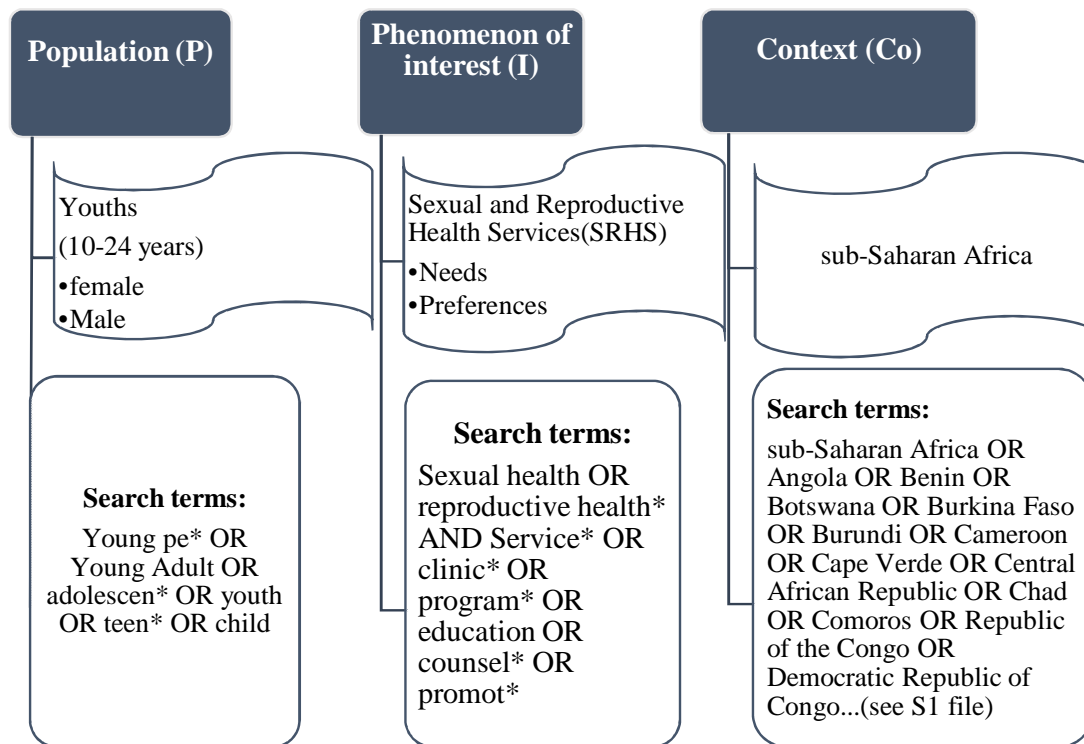

107

108 Fig 1: The PICo framework the review question and search terms

109

110

## 111 **Eligibility criteria**

112

113 **Population.** Youths aged 10-24 years in SSA were the target population. This is in line with  
114 the WHO's definition of youth [1]. Excluded groups were homeless, internally displaced  
115 persons, and refugees as their SRHS needs may differ substantially due to their situation [32,  
116 33].

117 **Phenomena of Interest.** Studies must have reported at least one of these relevant  
118 phenomena regarding SRHS: needs, requirements, preferences, choices, options, wants, or  
119 desires. Studies relating to general healthcare needs rather than SRHS specifically were  
120 excluded.

121 **Context.** All countries in SSA were included in accordance with review aims. Likewise, all  
122 SRHS locations were considered, including schools, marketplaces, transport terminals,  
123 clubhouses, community centres, health facilities [34]. Both facility-based and community-  
124 based SRHS settings were eligible.

125 **Publication types and study design:** Inclusion was limited to published, peer-reviewed  
126 studies. Grey literature was excluded as they can be difficult to comprehensively identify  
127 and access, introducing selection bias if relevant reports are missed [35]. Included papers  
128 were written in the English language, with the majority of African studies publish in English  
129 [36]. Unpublished studies, theses, conference papers, duplicates, and anecdotal reports  
130 were excluded because they lack the peer review process to ensure methodological rigor  
131 and may contain preliminary or duplicated data [35, 37]. Qualitative studies and mixed  
132 methods studies with distinct qualitative components (example, interviews, focus groups,

133 observations) were included as they provide deeper understanding of youth's needs and  
134 preferences related to SRHS [38].

## 135 **Study selection**

136 Identified articles were transferred into EndNote version 20 and then into Rayyan software  
137 [40–41]. Besides manual removal, both software programs enabled the elimination of  
138 duplicates. Rayyan was used as a platform to screen article titles, abstracts, and full texts  
139 based on the eligibility criteria stated above to identify included reports ([41]; Fig 2). Ten  
140 percent of the identified papers at title and abstract and full text were reviewed by a second  
141 reviewer and a kappa score calculated as an internal reliability check.

142

## 143 **Data extraction**

144 A modified data extraction tool from the Cochrane Collaboration was used [42]. The tool  
145 allowed for information such as author names, publication date, study title, study  
146 question/aims, participant demographics, design, population of interest, analysis methods,  
147 and findings to be captured from relevant studies. Data extraction was conducted  
148 independently by two researchers (VU and DS) with only qualitative data related to the  
149 needs and preferences of youths of SRHS in SSA were extracted.

## 150 **Quality appraisal**

151 The Critical Appraisal Skills Programme (CASP) qualitative checklist from the Cochrane  
152 Qualitative and Implementation Group was adopted to judge the quality of the included  
153 studies [104]. Two researchers (VU and HW) independently assessed the included papers'

154 quality [43]. The checklist has 10 questions (Q) revolving around the study aims, data  
155 collection methods, analysis, and results. Questions one to nine are closed-ended and have  
156 three possible responses: 'yes', 'can't tell', and 'no', while Q–10 is an open-ended question.  
157 As Long, et al. [44] argue, the CASP tool does not provide a standard for assessing the clarity  
158 and appropriateness of qualitative reporting. Yet, it is crucial to be transparent about any  
159 judgements made. Consequently, it was necessary to score questions 1–9. For each  
160 question, the responses "yes," "can't tell," and "no" were assigned scores of 2, 1, and 0,  
161 respectively. As Q10 is open-ended, scoring was not possible; thus, each paper's value was  
162 described (refer to S4 file for quality appraisal of included studies). While quality scoring  
163 allows for informative inter-study comparisons, even papers with lower scores provide  
164 useful textual data that contribute to the meta-ethnographic synthesis, hence were included  
165 in this review.

## 166 **Data synthesis**

167 A meta-ethnographic approach, developed by Noblit, Hare and Hare [45], was employed to  
168 explore the findings of the primary studies. This method allows for comparative integration  
169 of data rather than just description and is thus considered appropriate [46, 47]. Taking a  
170 meta-ethnography approach systematically transforms findings by drawing comparisons  
171 through the process of translation [45, 48]. Consequently, this approach enabled synthesis  
172 of youth's SRH needs and preferences across individual papers with greater explanatory  
173 power than narrative or thematic approaches [49, 50]. Its analytical nature and widespread  
174 use in non-ethnographies underscore its value [51–54].



175 The included papers were read and re-read to identify codes and examine interrelationships  
176 [45]. Studies were then translated into one another through reciprocal translation to  
177 determine similarities and refutational synthesis to identify discrepancies between  
178 metaphors [45, 46, 55]. Subsequently, lines of argument were developed to reach a holistic  
179 interpretation [56]. In meta-ethnography, quality refers not to methods but to metaphor  
180 adequacy for rich data [48, 57]. To reduce bias, VU, DS, and HW were independently  
181 involved in synthesis of the data.

182

## 183 **Results**

### 184 **Study selection**

185 As illustrated in Fig 2, an initial search was conducted in April 2022, and an updated search  
186 was performed in June 2023. The June 2023 search narrowed the date range to January  
187 2022 to June 2023, aiming to capture papers published since the initial search conducted  
188 between February and April 2022. The combined searches yielded a total of 3,085 papers.  
189 After removing duplicates, 2,237 titles and abstracts were screened based on eligibility  
190 criteria. Of these, 2,216 papers were excluded for various reasons, including deficiency in  
191 more than one exclusion criterion (1,324), an incorrect target population (84), an incorrect  
192 phenomenon of interest (402), an unsuitable study design (95), either systematic or scoping  
193 reviews (60), grey literature (246), questionnaire development (1), and non-English language  
194 (1).

195 Prior to finalising the selection process, 10% check of titles and abstracts was conducted on  
196 the retrieved articles by two independent researchers (VU and LM) to compute an inter-

197 rater reliability [58, 59]. Cohen's kappa ( $\kappa$ ) computation was 0.12, indicating slight  
198 agreement. This necessitated a review of the inclusion criteria, and more terms (wants and  
199 options) were introduced to represent the needs and preferences of youth and expand the  
200 phenomenon of interest component. Then, a second check was done since slight agreement  
201 may not allow confidence in the review process [60]. Cohen's value for the second 10%  
202 check revealed 0.66, indicating substantial agreement, and subsequently disagreements  
203 were settled by consensus [58, 61].

204 Twenty-four articles passed abstract screening, and attempts were made to retrieve full  
205 texts. However, one full-text article could not be accessed despite efforts to contact the  
206 authors. Consequently, 23 full-text articles were reviewed, of which three were  
207 subsequently excluded because one lacked data from youths while the other two used  
208 quantitative methods for data analysis. This led to the inclusion of 20 studies in the final  
209 review. The findings from the extraction are presented in a summary table reflecting the  
210 extent of available evidence in the accepted studies (see S3 file for data extraction  
211 summary).

## 212 **Quality appraisal**

213 The appraisal of the included papers using the CASP tool revealed generally sound  
214 methodological quality across the studies (see S4 File). Most studies described an  
215 appropriate methodology suitable for their stated research aims and objectives. However, a  
216 notable deficiency in many studies was observed concerning the declaration of potential  
217 biases [62–64]. Additionally, based on the quality judgement, one article [65] appeared to  
218 be of relatively low quality compared to the others. Nevertheless, no studies were excluded

219 solely based on quality, as the authors were primarily interested in extracting relevant

220 concepts from all included studies that directly mapped to the systematic review question.

221

222

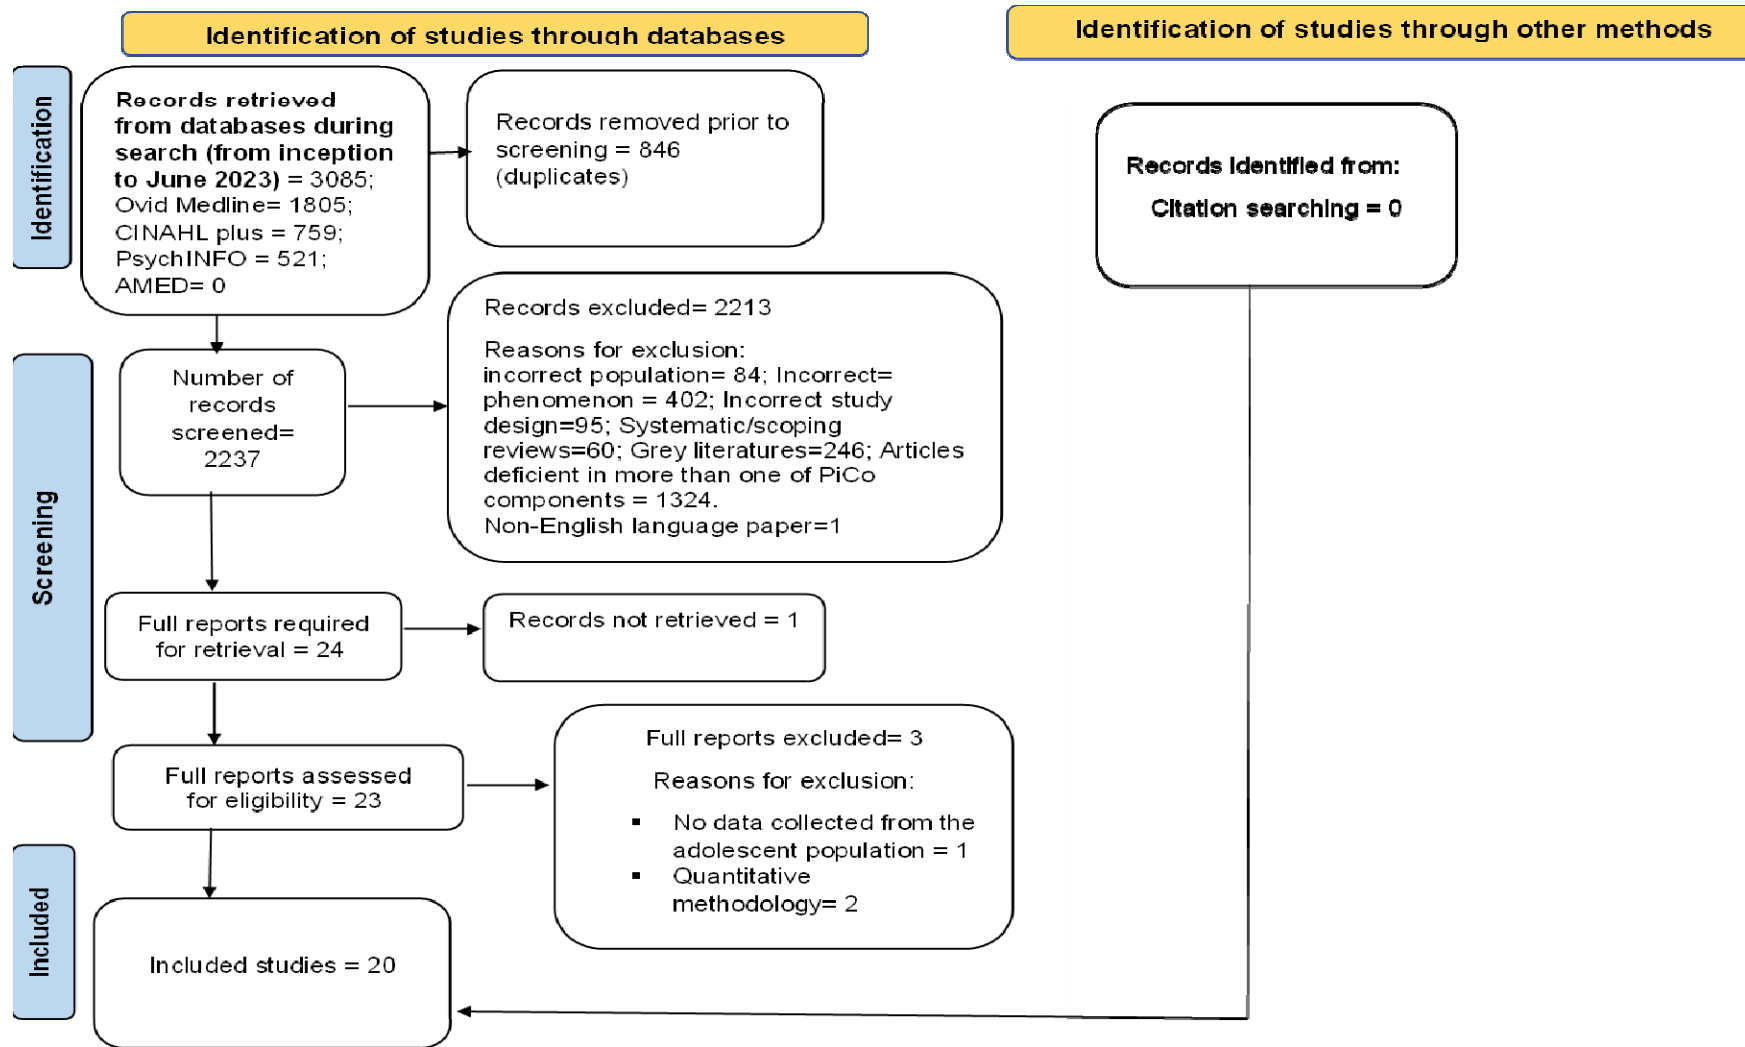

223 Fig 2: PRISMA Flow diagram showing the stages of study selection

## 224 **Study characteristics**

225 The 20 included studies involved participants ranging in age from 10 to 24 years old. Two  
226 papers specifically targeted females [64, 75], while the remaining 18 included both male and  
227 female. Eight papers focused on youths living with HIV [62, 63, 66, 72–74]. The studies were  
228 conducted in various countries, including Ethiopia, Kenya (3), Malawi (1), Nigeria (2), South  
229 Africa (6), Uganda (2), and Zambia (5). Seven studies were community-based, 12 were  
230 conducted in healthcare facilities, and one was a school-based study.

## 231 **Synthesis**

232 The meta-ethnographic synthesis resulted in four key themes encapsulating the breadth of  
233 sexual and reproductive health needs and preferences expressed by youths across the  
234 included studies; *information needs, social needs, service needs and delivery preferences* (Fig  
235 3). These four key themes encompassed multiple nested sub-themes and are represented  
236 below with participant quotes.

237

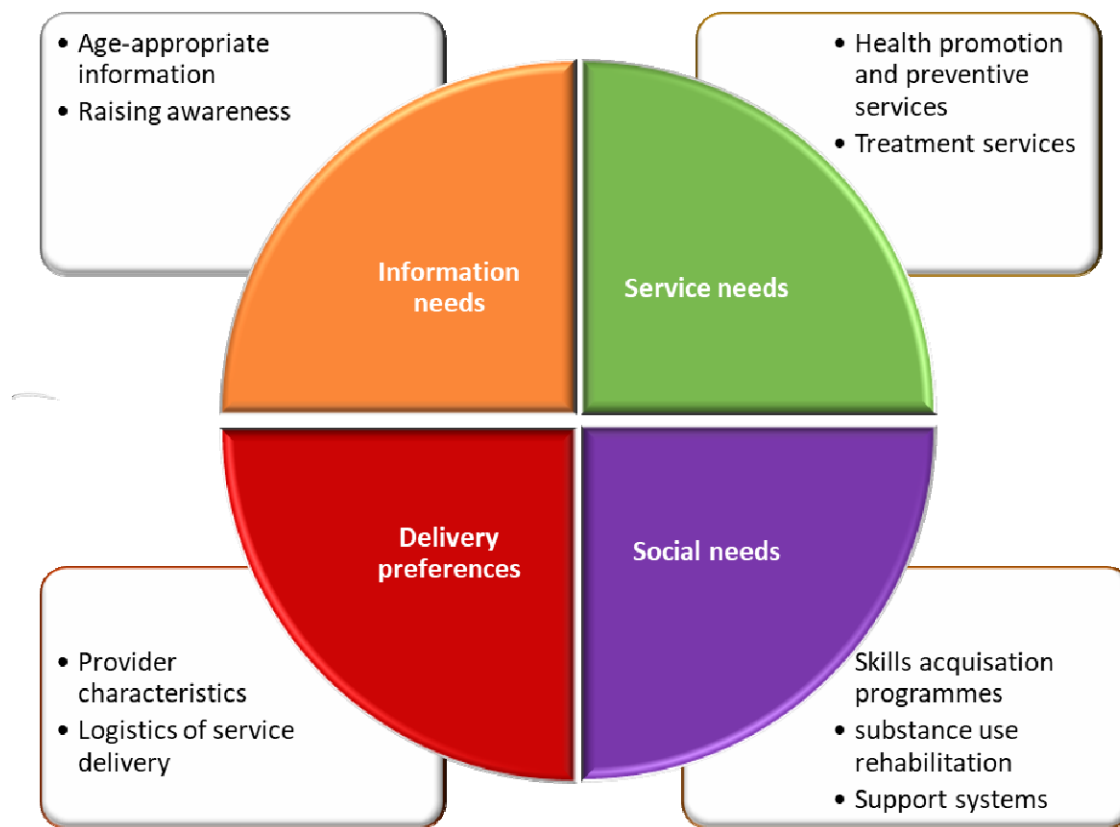

238

239

240 Fig 3: Showing main themes and sub-themes

241

## 242 **Theme 1 – Information needs**

243 This theme emerged across all included studies, highlighting youths' desire for information

244 on safe reproductive and sexual health topics like contraception and condom use. As one

245 participant stated: *“people are no longer given deep information about these things [sexual*

246 *health], they are only given average information”* [64]. No refuting perspectives arose for

247 this theme, although information preferences differed by gender [66, 67]. Males wanted

248 details on proper condom use— *“...the need for condoms, you can go to the health facility*

249 *and they give them to you but there are some people who do not know how to use them”*

250 [68]. Females preferred information on menstruation, relationships, hygiene, safer sex, and

251 abortion to avoid unsafe procedures and consequences: *"They don't get good counselling or*  
252 *advice on how they can protect and take care of the pregnancies. So they end up aborting"*

253 [68]. This theme had two sub-themes: ***age-appropriate information*** and ***raising awareness***.

254 *Age-Appropriate Information:* Youths expressed needing information tailored to their age  
255 covering bodily changes, contraceptives, safer sex, and sexual health issues to meet their  
256 needs [67, 69–71]. As one noted: *"I have tried to ask them for more information but they did*  
257 *not give me enough. What they told me was not very useful..."* [72]. HIV-positive youths also  
258 wanted productive life information regardless of status [72–74], stating: *"We have a right to*  
259 *having a family and have children"* [72]. Some studies revealed misunderstandings around  
260 conception and prevention [63, 67, 74]. Youths faced barriers obtaining age-appropriate  
261 information, including provider disconnects on suitability—*"sometimes we go to clinics and*  
262 *then they say 'why do you want to know, you are still too young...'"* [75]—and discussing  
263 sexual health with parents due to stigma [75]. Hence information often came from peers  
264 and siblings instead: *"yeah, sisters educate about abortion and they even tell you that*  
265 *abortion is no easy matter because you are then between life and death. They actually teach*  
266 *us about many things"* [75]. Mass media was acknowledged a major source SRH information  
267 [75].

268 *Raising Awareness:* Youths emphasised awareness raising for parents, youths and  
269 communities regarding youth needs and preferences to ensure access to information and  
270 services [70, 76, 77]. Stigma and misconceptions were cited as barriers: *"Stigma, if you are*  
271 *seen going to the hospital, it's like you're engaging in sex. So, society will have a particular*  
272 *perception of you"* [69]; parents disapproved due to stigma [62, 64]. Parent sensitisation  
273 was thus needed: *"Parents do not want to give their children time to access this information,*

274 *maybe because they feel it is not the right time... but generally somebody who is 15 years,*  
275 *that one to me needs lots of counselling and guidance from both home and outside home”*  
276 [69]. Community outreach could also raise awareness of available services [68, 70, 76]. If  
277 services are perceived as meeting youths’ needs, utilisation may increase [14].

## 278 **Theme 2: Social needs**

279 Social contexts including the acquisition of skills, substance use rehabilitation, and support  
280 systems shaped youth SRH needs. Targeted programmes in these areas were acknowledged  
281 to promote healthier sexual and reproductive health behaviours. Three sub-themes  
282 encapsulate these social needs: ***Skill acquisition programmes, substance use rehabilitation,***  
283 ***and support systems.***

284 *Skill acquisition programmes:* Youths required skills for healthy relationships and economic  
285 productivity [67, 72, 76,]. Desired skills included negotiation, decision-making, and refusal  
286 skills to avoid unsafe sex practices [67, 72, 76]. As one female noted, such skills could  
287 empower responses to unwanted sexual advances: *“If a boy is forcing you...what must you*  
288 *do?”* [67]. Vocational skills, such as sewing and catering, were sought to address economic  
289 challenges and empower youths, with gender-specific preferences [72]. *“...one thing that I*  
290 *would really like is being taught life skills because as it is, no one teaches us these things. I*  
291 *would like to learn how to cook, and also tailoring”* [72].

292 *Substance use rehabilitation:* Rehabilitation was needed to address links between substance  
293 use and sexual violence. As youths explained, *“Things that cause rapes are the use of*  
294 *drugs...[which] may also cause raping a child”* [69]. lack of job opportunities and peer



295 pressure were identified as substance use triggers-"*Most of the youths don't have what to*  
296 *do - they resort to taking alcohol, opium, cigarettes and marijuana*" [68].

297 *Support Systems:* Family and peer support encouraged SRH service use [74, 76], "*You need*  
298 *support from people who will understand your condition*" [67]. However, negative parental  
299 attitudes hindered communication and support-seeking behaviours: "*When we ask our*  
300 *parents they become aggressive, they shout at us not wanting to talk to us, saying, 'why do*  
301 *want to know about such things'*" [75]. Youths living with HIV express varying attitudes  
302 toward family support, highlighting the importance of early parental disclosure for timely  
303 treatment: "*The fact my family kept this from me made me very sad; [for a time] I hated my*  
304 *mother*" [74]. Support groups foster positive networks, aiding youths in coping with SRH-  
305 related stress, although concerns about disclosure exist among some HIV-positive youths:  
306 "*It will hurt if other people know, they will joke about it*" [73].

307

### 308 **Theme 3: Service needs**

309 Youths wanted services directly addressing their sexual and reproductive health issues. The  
310 need for a wide range of services was reported due to perceived gaps at local health  
311 facilities [67, 69, 71, 77-78]. This theme had two sub-themes: **preventive services** and  
312 **treatment services**.

313 *Preventive Services:* All studies noted youths wanting health promotion and preventive  
314 sexual and reproductive services like HIV testing and counselling, antenatal care,  
315 counselling, and contraceptives: "*If we use contraceptives we can have a manageable*  
316 *number of children, rather than having so many that we can't raise them*" [79]. Lacking

317 these, risky alternatives emerged [66–68], example, “*make their own condoms – using bread*  
318 *bags – so they won't be seen trying to get condoms in public*” [67]. Services were seen as  
319 only for married couples, not youths: “*I have not received such (family planning services),*  
320 *and I don't think it is made for adolescents. It is only for married couples*” [80].

321 *Treatment Services*: Youths across all studies wanted STI testing and treatment services for  
322 issues like candidiasis, syphilis, and HIV/AIDS [65, 70, 71, 79]: “*...when you get infected with*  
323 *diseases like Candida...we fall sick all of the time, the trenches here spread diseases due to*  
324 *poor sanitation*” [71]. Reported lack of access may drive this demand: “*She had been to*  
325 *Kasangati health centre and they told her that the drugs are not there...*” [68]. One study  
326 mentioned needing timely referrals for serious cases [65]. With unmet treatment needs,  
327 youths often relied on peers or unsafe options like herbs or traditional healers [66, 68, 76]:  
328 “*When we get problems, sometimes we tell our friends...so that is what she is using*” [68].  
329 Access to such services is critical to reduce youth suffering, morbidity and mortality.

#### 330 **Theme 4- Delivery preferences**

331 The theme indicates youth dissatisfaction with SRHS in healthcare facilities, evident in all  
332 included papers, with two subthemes: ***provider characteristics*** and ***logistics of service***  
333 ***delivery***.

334 *Provider characteristics*: Youths prefer providers offering high-quality SRHS, emphasising  
335 welcomeness, trustworthiness, respect, confidentiality, friendliness, same-gender providers,  
336 and competency [64, 69, 70, 72, 81]. Negative provider attitudes, lack of privacy, and  
337 rudeness deter youths from public health facilities [68, 72, 76]. Youths living with HIV  
338 requested autonomy in disclosure and challenge providers to respect their confidentiality —

339 *"Everyone was looking at me in a funny way and whispering, 'This is the one who is sick, she*  
340 *has AIDS.'* This was very painful for me because I thought that it was my right to disclose to  
341 *people about my status. I felt that my rights were violated"* [72]. Negative experiences lead  
342 youths to favour competent, non-judgmental providers [68, 70].

343 In some studies, youths express discomfort with providers of the opposite-sex, while others  
344 prefer gender-specific providers — *"Sometimes it is difficult or embarrassing to open up to*  
345 *someone of the opposite sex"* [77]. The need for same-gender preference may be related to  
346 youth's personal values, which tend to shape the life of an individual. Younger SRH providers  
347 were seen as being more equipped to understand and address the SRHS of youths and  
348 would relate with the youths in an appropriate manner- *"Younger staff can understand*  
349 *challenges facing adolescents and address our issues as adolescents..."* [66]. However, in  
350 some other studies youths preferred older SRH providers. Older providers were viewed as  
351 experienced and, therefore, competent in the delivery of SRHS - *"... it is better to get*  
352 *information from experienced adults like your mother or health staff"* [66].

353 *Logistics of service delivery:* Youths desire dedicated SRHS facilities, adequate staffing,  
354 quality medical supplies, free services, short wait times, and youth reward systems [79, 80,  
355 82]. They preferred services tailored to their needs and reported dissatisfaction with  
356 existing facilities and claimed they were designed for adults [68, 72, 76]. Youths desired  
357 attractive youth-friendly clinics with recreational facilities and enough staff [76] — *"...I can*  
358 *go there to play, to watch movies, I can be guided, I can be tested"* [76]. Cost and long waits  
359 in existing facilities hindered access, prompting a preference for free services and rewards  
360 [77, 79]. Financial constraints and poverty further challenged youths' SRHS access to SRH

361 services [71, 72]. Thus, youth-oriented services and understanding providers were lacking,  
362 leading youths to relying on social media or traditional healers instead [66, 68, 72, 76, 81].

363

## 364 **Discussion**

365 This review explored the SRHS needs and preferences of youths aged 10-24 in SSA. The  
366 synthesis of evidence highlights the importance of targeted information, alignment of SRH  
367 services to diverse youth needs, addressing social needs for holistic SRHS, and tailoring  
368 delivery preferences to empower and enhance the SRH experiences of this population.

### 369 ***Youth empowerment through targeted information***

370 Sexual and reproductive health information has demonstrated benefits in preparing youths  
371 against risks of unsafe behaviours [83, 84]. However, youths lack access to age-appropriate  
372 information, relying on uncertain social or peer sources instead [4]. Guided, professionally  
373 informed education tailored to maturity levels could aid healthy development [85, 86]. The  
374 current review supports this finding that SRH education is most effective when it is  
375 professionally informed and guided based on the maturity levels and needs of youths. This  
376 is because, most youths were ill-prepared on reproductive changes, desiring parental and  
377 provider discussions to facilitate access and dispel stigma [68]. Empowering youths with  
378 desired knowledge also promote healthy sexuality attitudes [84]. In line with this, our  
379 review found that guided education enables youths to develop healthy sexuality  
380 perspectives and protects against risky sexual and reproductive behaviours. As youths  
381 understand their needs, ensuring youths can access age-appropriate sexual health

382 information is critical to empowering them to understand their bodies and make healthy  
383 SRH choices.

384

385

### 386 ***Aligning SRH services to diverse youth needs***

387 In the current review, papers identified various youth SRH needs ranging from promotion  
388 and preventive to treatment services. Findings demonstrated gaps in aligning care and  
389 environments to youth realities. As a result, there is an increased prevalence of unsafe self-  
390 help alternatives [68, 87]. This situation, predominant in low- and middle-income countries,  
391 where systemic shortcomings, such as social stigma, taboos, and restrictive policies, often  
392 hinder the effective positioning of SRH services in relation to youth realities [88–90].  
393 However, in high-income countries, initiatives have aimed at tailoring SRH services to better  
394 suit youths, promoting better coordination, and addressing diverse needs [91]. These  
395 disparities contribute to adverse sexual and reproductive health outcomes [34, 92]. Thus,  
396 emphasising the imperative for increased attention and tailored strategies in these regions  
397 to bridge the gap and improve the provision of youth-friendly SRH services [93, 94].  
398 Comprehensive SRH services are embodied rights for youth development [92]. Yet findings  
399 showed youths do not seek facility-based SRH services, due to perceived unavailability of  
400 services and stigma. Addressing negative social norms through community dialogue and  
401 sensitisation could dispel misconceptions and promote access to quality SRH services [95,  
402 96]. Additionally, most youths want quality clinical services from competent providers.

403 Ensuring available, accessible, non-judgmental youth-focused SRH services should be a  
404 priority.

### 405 ***Addressing social needs for holistic SRHS***

406 Acknowledging the intertwined social and economic factors influencing youth SRHS  
407 outcomes, skills development programmes that consider gender preferences may facilitate  
408 healthy decision-making capacities [5, 72,]. Integrated substance abuse and mental health  
409 services have also been identified as critical for reducing risky behaviours [97, 98, 99]. High-  
410 income countries like the UK and US have adopted a more holistic approach, shifting certain  
411 centres towards a one-stop model that integrates clinical, social, and educational support  
412 [39, 98, 99]. Meanwhile, initiatives in countries such as Mexico, India, and South Africa have  
413 incorporated life skills building, education, vocational training, and livelihood support  
414 alongside clinical SRH services [100–102]. Such comprehensive models agree with the  
415 multifaceted youth needs and preferences, showing promise for improving access and  
416 health outcomes. However, youth-centred comprehensive SRHS remains less uniformly  
417 implemented in sub-Saharan Africa [103]. As Hujo and Carter [105] argue, more holistic  
418 community-based approaches may be better suited to address the multidimensional youth  
419 realities in this region, yet require greater resource mobilisation and political backing for  
420 realisation. Additional implementation research could catalyse suitable integrated services  
421 for marginalised African youth [103, 105]. In conducting such research, recognising familial  
422 and peer support as identified facilitators for SRHS access further emphasises the potential  
423 value of social network integration into youth SRHS programmes [106, 107]. Such  
424 comprehensive models align with youth preferences and show promise for improving access  
425 and health outcomes.

## 426 ***Tailoring delivery preferences for youths***

427 The review illuminates the significance of provider characteristics (welcomeness,  
428 trustworthiness, respect, confidentiality) and logistics of delivery (adequate staffing, quality  
429 supplies, free services) in shaping youths' experiences with SRHS [4, 70]. Unfavourable  
430 provider attitudes contribute to barriers in accessing SRHS, necessitating training guided by  
431 WHO's quality standards [13, 14]. Specifically, WHO's recommendation for youth-friendly  
432 health services include accessible locations and hours, lower cost, respectful and  
433 confidential care, peer counselling, comprehensive services, provider competencies, youth  
434 and community involvement [13, 14]. Preferences for same-sex providers, youth-only  
435 centres, and incentives accentuate the importance of recognising and respecting youths'  
436 choices for effective SRHS [1, 62, 107]. Recognising and integrating youths' preferences is  
437 critical for uptake and sustained engagement with SRHS. The COM-B model identifies  
438 capability, opportunity, and motivation as key components that need to be targeted for  
439 successful interventions aimed at changing behaviour [108, 109]. Addressing these areas in  
440 youth-friendly services can directly enable youths to access and engage with sexual and  
441 reproductive health services.

## 442 **Implications for practice**

443 There is a clear need for more comprehensive, youth-friendly sexual and reproductive  
444 health services tailored to meet the informational and service needs of youth. This includes  
445 age-appropriate education, access to contraception, STI testing and treatment and  
446 counselling. Also, awareness campaigns are needed to reduce stigma around youth sexual  
447 health topics in communities and facilitate more open communication with both health

448 providers and parents/families. This can pave the way for better support systems. Providers  
449 require additional training on delivering youth-friendly sexual and reproductive health  
450 services fostering trust, ensuring privacy/confidentiality, communicating respectfully  
451 without judgment, allowing autonomy, and understanding preferences around provider  
452 characteristics like age and gender. Dedicated youth health facilities are needed rather than  
453 expecting youth to utilise the same services designed for adults. These centres should be  
454 appealing, have adequate staffing/supplies, provide comprehensive and free/low-cost  
455 services, involve minimal wait times, and consider incentive programmes. Programmes to  
456 equip youth with life skills including healthy relationship building, decision making around  
457 sexual behaviours and economic empowerment skills are helpful. This can reduce risky  
458 sexual behaviours. Links between risky sexual behaviours and issues like substance use  
459 stress the need for accessible counselling and rehabilitation services tailored to youth.

## 460 **Strength and limitations**

461 This review has several strengths in its systematic approach. Multiple databases were  
462 comprehensively searched to identify relevant studies on youth SRHS in SSA. Screening,  
463 quality appraisal by two independent reviewers, and use of meta-ethnography methodology  
464 conform with guidance on robust qualitative evidence synthesis. By synthesising insights  
465 across primary studies, this review provides qualitative evidence on the delivery situation of  
466 youth SRHS in SAA. Findings may inform strategic planning to develop safer, more youth-  
467 friendly services in this region. As only qualitative research was included, judgements on  
468 cause-and-effect relationships could not be made. Future mixed-methods reviews could  
469 further explore provider attitudes and quantitatively assess youth SRHS needs and  
470 preferences. This review specifically represents perspectives within sub-Saharan Africa;



471 broader reviews would allow comparison of youth needs globally. However, applied  
472 strategically, these findings may strengthen the adaptation of services to better cater for  
473 youth SRHS priorities in sub-Saharan African communities.

## 474 **Conclusion**

475 This review explored the needs and preferences of youths concerning SRHS. Twenty primary  
476 studies met the eligibility criteria, and the findings of the review indicate that sexual and  
477 reproductive healthcare in SSA is currently not tailored to align with the needs and  
478 preferences of youths. This departure from the WHO-recommended delivery gold standard  
479 highlights a pressing need to rectify existing gaps in the provision of sexual and reproductive  
480 health services. While globally generalisable solutions are unrealistic, a multifaceted  
481 approach is required to meet the needs and preferences of youths across information,  
482 service, social and delivery realms to ensure access to and well-being of youth sexual and  
483 reproductive health. Key youth preferences centre on desiring guided education matched to  
484 maturity levels, tailoring of available SRH services to their diverse needs, integration of  
485 social dimensions like skills training, and youth-friendly delivery considerations around  
486 provider characteristics and atmospheres. Further research is warranted to develop youth-  
487 centred models of SRHS delivery that integrate these preferences in order to improve access  
488 and outcomes. Understanding and incorporating youths' needs and preferences in the  
489 planning of sexual and reproductive health services will be imperative to enhancing their  
490 overall welfare.

## 491 **Author contributions**

492 Victoria Uka conceived, designed, and conducted the review, performed data synthesis, and  
493 drafted the manuscript. Debbie M. Smith and Helen White provided critical guidance and  
494 supervision throughout the review design and conduction, actively participated in data  
495 synthesis, and critically revised the manuscript. All authors read and approved the final  
496 manuscript with no competing interest.

## 497 **Acknowledgement**

498 The authors express their gratitude for the support provided during this review. The first  
499 author, Victoria Uka, acknowledges the financial support received from the Tertiary  
500 Education Trust Fund, Nigeria, for her doctoral research, which allowed the review process.  
501 The funding agency had no involvement in the conception, methods, data synthesis,  
502 discussion, manuscript preparation, or the decision to submit the manuscript for  
503 publication. Special thanks to Leah Millard of the University of Manchester, United Kingdom  
504 for her dedicated screening of a percentage of titles and abstracts, enhancing the rigour of  
505 this review. The authors also extend their appreciation to the participants and researchers  
506 whose work contributed to the primary studies included in this review. Their invaluable  
507 contributions have enriched the synthesis of evidence presented in this manuscript.

508

509

510

511

512

513

514

515

516

517

518

519

520

521

522

523

524

525

## 526 **References**

527 1. World Health Organization. J Adolesc Health. [Cited 02 December 2023]. Available from:  
528 <https://www.who.int/southeastasia/health-topics/adolescent-health>. 2023.

529 2. Singh JA, Siddiqi M, Parameshwar P, Chandra-Mouli V. World Health Organization guidance on  
530 ethical considerations in planning and reviewing research studies on sexual and reproductive  
531 health in adolescents. J Adolesc Health. 2019 Apr;64: 427-429.  
532 doi: [10.1016/j.jadohealth.2019.01.008](https://doi.org/10.1016/j.jadohealth.2019.01.008) • PubMed: [30904091](https://pubmed.ncbi.nlm.nih.gov/30904091/) • PubMed Central: [PMC6496912](https://pubmed.ncbi.nlm.nih.gov/PMC6496912/).  
533 [Google Scholar](#).

534 3. van Sluijs EMF, Ekelund U, Crochemore-Silva I, Guthold R, Ha A, Lubans D et al. Physical activity  
535 behaviours in adolescence: current evidence and opportunities for intervention. Lancet.  
536 2021;398: 429-442.  
537 doi: [10.1016/S0140-6736\(21\)01259-9](https://doi.org/10.1016/S0140-6736(21)01259-9) • [Google Scholar](#).

538 4. Ninsiima LR, Chiumia IK, Ndejjo R. Factors influencing access to and utilisation of youth-friendly  
539 sexual and reproductive health services in sub-Saharan Africa: a systematic review. Reprod  
540 Health. 2021;18: 135.  
541 doi: [10.1186/s12978-021-01183-y](https://doi.org/10.1186/s12978-021-01183-y) • [Google Scholar](#).

542 5. George AS, Amin A, de Abreu Lopes CM, Ravindran TKS. Structural determinants of gender  
543 inequality: why they matter for adolescent girls' sexual and reproductive

- 544 health. BMJ. 2020;368 : l6985.  
545 doi: [10.1136/bmj.l6985](https://doi.org/10.1136/bmj.l6985) • [Google Scholar](#).
- 546 6. Ibitoye M, Choi C, Tai H, Lee G, Sommer M. Early menarche: A systematic review of its effect on  
547 sexual and reproductive health in low- and middle-income countries. PLOS ONE. 2017;12:  
548 e0178884.  
549 doi: [10.1371/journal.pone.0178884](https://doi.org/10.1371/journal.pone.0178884) • [Google Scholar](#).
- 550 7. Liang M, Simelane S, Fortuny Fillo G, Chalasani S, Weny K, Salazar Canelos P et al. The state of  
551 adolescent sexual and reproductive health. J Adolesc Health. 2019;65: S3-S15.  
552 doi: [10.1016/j.jadohealth.2019.09.015](https://doi.org/10.1016/j.jadohealth.2019.09.015) • [Google Scholar](#).
- 553 8. Uka VK, Ekpoanwan EE, Nsemo AD, Etowa JB. Sexual and reproductive health services  
554 awareness and utilisation among young people in a semi-Urban community in Cross River State,  
555 Nigeria. Afr J Reprod Health. 2023;27: 58-70.  
556 doi: [10.29063/ajrh2023/v27i5s.8](https://doi.org/10.29063/ajrh2023/v27i5s.8) • [Google Scholar](#).
- 557 9. Namoro SD. Youth reproductive health in sub-Saharan Africa. Is governance part of the  
558 problem? [Cited 7 July 2022] Available from:  
559 <https://ideas.repec.org/p/pit/wpaper/347.html> (No. 347); 2009.
- 560 10. Omo-Aghoja LO, Aisien OA, Akuse JT, Bergstrom S, Okonofua FE. Maternal mortality and  
561 emergency obstetric care in Benin City, South-south Nigeria. J Clin Med Res. 2010;2: 55-61 •  
562 [Google Scholar](#).
- 563 11. Sommers M. Urban youth in Africa. Environ Urb. 2010;22: 317-332.  
564 doi: [10.1177/0956247810377964](https://doi.org/10.1177/0956247810377964) • [Google Scholar](#).
- 565 12. Wado YD, Bangha M, Kabiru CW, Feyissa GT. Nature of, and responses to key sexual and  
566 reproductive health challenges for adolescents in urban slums in sub-Saharan Africa: A scoping  
567 review. Reprod Health. 2020;17: 149.  
568 doi: [10.1186/s12978-020-00998-5](https://doi.org/10.1186/s12978-020-00998-5) • [Google Scholar](#).
- 569 13. World Health Organisation. Sexually transmitted infections (STIs). [Cited 23 January, 2024].  
570 Available from: [https://www.who.int/news-room/fact-sheets/detail/sexually-transmitted-](https://www.who.int/news-room/fact-sheets/detail/sexually-transmitted-infections-(stis))  
571 [infections-\(stis\)](https://www.who.int/news-room/fact-sheets/detail/sexually-transmitted-infections-(stis)); 2023.

- 572 14. World Health Organisation. Global standards for quality health care services for adolescents.  
573 Geneva. [cited 28 October 2021]. Available from: [https://www.who.int/news/item/06-10-2015-](https://www.who.int/news/item/06-10-2015-who-unaid-launch-new-standards-to-improve-adolescent-care)  
574 [who-unaid-launch-new-standards-to-improve-adolescent-care](https://www.who.int/news/item/06-10-2015-who-unaid-launch-new-standards-to-improve-adolescent-care); 2015.
- 575 15. United Nations Children Emergency Fund. (2023). Adolescent HIV prevention. Available at:  
576 <https://data.unicef.org/topic/hivaids/adolescents-young-people/> [cited 05 September 2023].
- 577 16. Santhya KG, Acharya R, Pandey N, Singh SK, Rampal S, Zavier AJ et al. Understanding the lives of  
578 adolescents and young adults (UDAYA) in Bihar, India. Available from:  
579 <https://www.projectudaya.in/wp-content/uploads/2018/08/UP-Report-pdf.pdf>; 2017.
- 580 17. Glynn JR, Sunny BS, DeStavola B, Dube A, Chihana M, Price AJ et al. Early school failure predicts  
581 teenage pregnancy and marriage: A large population-based cohort study in northern  
582 Malawi. PLOS ONE. 2018;13: e0196041.  
583 doi: [10.1371/journal.pone.0196041](https://doi.org/10.1371/journal.pone.0196041) • [Google Scholar](#).
- 584 18. Goossens G, Kadji C, Delvenne V. Teenage pregnancy: a psychopathological risk for mothers and  
585 babies? Psychiatr Danub. 2015 Sep;27 Suppl 1: S499-S503.  
586 PubMed: [26417827](https://pubmed.ncbi.nlm.nih.gov/26417827/) • [Google Scholar](#).
- 587 19. Aderibigbe SA, Araoye MO, Akande TM, Monehin JO, Musa OI, Babatunde OA. Teenage  
588 pregnancy and prevalence of abortion among in-school adolescents in North Central,  
589 Nigeria. Asian Soc Sci. 2011;7: 122.  
590 doi: [10.5539/ass.v7n1p122](https://doi.org/10.5539/ass.v7n1p122) • [Google Scholar](#).
- 591 20. Bhandari SD, Joshi S. Perception and perceived experiences about prevention and consequences  
592 of teenage pregnancy and childbirth among teenage mothers: A qualitative study. J Adv Acad  
593 Res. 2016;3: 164-172.  
594 doi: [10.3126/jaar.v3i1.16625](https://doi.org/10.3126/jaar.v3i1.16625) • [Google Scholar](#).
- 595 21. Irvine H, Bradley T, Cupples M, Boohan M. The implications of teenage pregnancy and  
596 motherhood for primary health care: unresolved issues'. Br J Gen Pract. 1997;47: 323-326.  
597 [Google Scholar](#).
- 598 22. Hegde A, Chandran S, Pattnaik JI. Understanding adolescent sexuality: A developmental  
599 perspective. J Psychosexual Health. 2022;4: 237-242.  
600 doi: [10.1177/26318318221107598](https://doi.org/10.1177/26318318221107598) • [Google Scholar](#).

- 601 23. Baumrind D, Moselle KA. A developmental perspective on adolescent drug abuse. In Alcohol and  
602 substance abuse in adolescence 2014 May 22 (pp. 41-68). Routledge.  
603 doi: [https://doi.org/10.1300/J251v04n03\\_03](https://doi.org/10.1300/J251v04n03_03)
- 604 24. Nair MK, Paul MK, John R. Prevalence of depression among adolescents'. Indian J Pediatr.  
605 2004;71: 523-524.  
606 doi: [10.1007/BF02724294](https://doi.org/10.1007/BF02724294) • [Google Scholar](#).
- 607
- 608 25. Bearinger LH, Sieving RE, Ferguson J, Sharma V. 'Global perspectives on the sexual and  
609 reproductive health of adolescents: Patterns, prevention, and potential' *The f. Lancet*. 2007;369:  
610 1220-1231.  
611 doi: [10.1016/S0140-6736\(07\)60367-5](https://doi.org/10.1016/S0140-6736(07)60367-5) • [Google Scholar](#).
- 612 26. Igras SM, Macieira M, Murphy E, Lundgren R. Investing in very young adolescents' sexual and  
613 reproductive health. *Glob Public Health*. 2014;9: 555-569.  
614 doi: [10.1080/17441692.2014.908230](https://doi.org/10.1080/17441692.2014.908230). [Epub 2014 May 13].  
615 PubMed: [24824757](https://pubmed.ncbi.nlm.nih.gov/24824757/) • PubMed Central: [PMC4066908](https://pubmed.ncbi.nlm.nih.gov/PMC4066908/).  
616 [Google Scholar](#).
- 617 27. Ojong IN, Chiotu CN, Duke EU, Uka VK. School-based survey of adolescents' opinion on  
618 premarital sex in selected secondary schools in yakurr local government area, Cross River State,  
619 Nigeria. *Glob J Pure Appl Sci*. 2015;21: 191-195.  
620 doi: [10.4314/gjpas.v21i2.11](https://doi.org/10.4314/gjpas.v21i2.11) • [Google Scholar](#).
- 621 28. Biddlecom AE, Munthali A, Singh S, Woog V. Adolescents' views of and preferences for sexual  
622 and reproductive health services in Burkina Faso, Ghana, Malawi and Uganda. *Afr J Reprod*  
623 *Health*. 2007 Dec;11: 99-110.  
624 doi: [10.2307/25549734](https://doi.org/10.2307/25549734) • PubMed: [18458737](https://pubmed.ncbi.nlm.nih.gov/18458737/) • PubMed Central: [PMC2367115](https://pubmed.ncbi.nlm.nih.gov/PMC2367115/).  
625 [Google Scholar](#).
- 626 29. Page MJ, McKenzie JE, Bossuyt PM, Boutron I, Hoffmann TC, Mulrow CD et al. The PRISMA 2020  
627 statement: an updated guideline for reporting systematic reviews. *Int J Surg*. 2021;88: 105906.  
628 doi: [10.1016/j.ijvsu.2021.105906](https://doi.org/10.1016/j.ijvsu.2021.105906) • [Google Scholar](#).

- 629 30. Joanna Briggs institute. JBI Manual for Evidence Synthesis: 2.6.2 Review question. [Cited 13  
630 October 2023]. Available from: [https://jbi-global-wiki.refined.site/space/MANUAL/4688141/  
631 2.6.2+ Review+question](https://jbi-global-wiki.refined.site/space/MANUAL/4688141/2.6.2+Review+question); 2022.
- 632 31. Booth A. Searching for qualitative research for inclusion in systematic reviews: a structured  
633 methodological review. *Syst Rev.* 2016;5: 74.  
634 doi: [10.1186/s13643-016-0249-x](https://doi.org/10.1186/s13643-016-0249-x) • [Google Scholar](#).
- 635 30. Page MJ, McKenzie JE, Bossuyt PM, Boutron I, Hoffmann TC, Mulrow CD et al. The PRISMA 2020  
636 statement: an updated guideline for reporting systematic reviews. *Int J Surg.* 2021;88: 105906.  
637 doi: [10.1016/j.ijvsu.2021.105906](https://doi.org/10.1016/j.ijvsu.2021.105906) • [Google Scholar](#).
- 638 31. Booth A. Searching for qualitative research for inclusion in systematic reviews: a structured  
639 methodological review. *Syst Rev.* 2016;5: 74.  
640 doi: [10.1186/s13643-016-0249-x](https://doi.org/10.1186/s13643-016-0249-x) • [Google Scholar](#).
- 641 32. Hindin MJ, Fatusi AO. Adolescent sexual and reproductive health in developing countries: an  
642 overview of trends and interventions. *Int Perspect Sex Reprod Health.* 2009;35: 58-62.  
643 doi: [10.1363/ipsrh.35.058.09](https://doi.org/10.1363/ipsrh.35.058.09) • [Google Scholar](#).
- 644 33. Akinsulure-Smith AM, Dachos N, Jones WL. Nah we yone's de fambul camp: facilitating  
645 resilience in displaced african children. *J Immigr Refugee Stud. AL.* 2013;11: 221-240.  
646 doi: [10.1080/15562948.2013.801721](https://doi.org/10.1080/15562948.2013.801721) • [Google Scholar](#).
- 647 34. Denno DM, Hoopes AJ, Chandra-Mouli V. Effective strategies to provide adolescent sexual and  
648 reproductive health services and to increase demand and community support. *J Adolesc Health.*  
649 2015;56 (1) Suppl: S22-S41.  
650 doi: [10.1016/j.jadohealth.2014.09.012](https://doi.org/10.1016/j.jadohealth.2014.09.012) • [Google Scholar](#).
- 651 35. Paez A. Gray literature: an important resource in systematic reviews'. *J Evid Based Med.*  
652 2017;10: 233-240.  
653 doi: [10.1111/jebm.12266](https://doi.org/10.1111/jebm.12266) • [Google Scholar](#).
- 654 36. Page MJ, Higgins JP, Sterne JA. Chapter 13. Available from:  
655 <https://training.cochrane.org/handbook/current/chapter-13>. Assessing risk of bias due to  
656 missing results in a synthesis; 2019. pp. 349-374.

- 657 37. McKibbin KA, Wilczynski NL, Haynes RB. Developing optimal search strategies for retrieving  
658 qualitative studies in PsycINFO. *Eval Health Prof.* 2006;29: 440-454.  
659 doi: [10.1177/0163278706293400](https://doi.org/10.1177/0163278706293400) • [Google Scholar](#).
- 660 38. Yates J, Leggett T. Qualitative research: an introduction. *Radiol Technol.* 2016;88: 225-231.  
661 [Google Scholar](#).
- 662 39. Hetrick SE, Bailey AP, Smith KE, Malla A, Mathias S, Singh SP et al. Integrated (one-stop shop)  
663 youth health care: best available evidence and future directions. *Med J Aust.* 2017 Nov 20;207:  
664 S5-S18.  
665 doi: [10.5694/mja17.00694](https://doi.org/10.5694/mja17.00694) • PubMed: [29129182](https://pubmed.ncbi.nlm.nih.gov/29129182/) • [Google Scholar](#).
- 666 40. Harrison H, Griffin SJ, Kuhn I, Usher-Smith JA. Software tools to support title and abstract  
667 screening for systematic reviews in healthcare: an evaluation. *BMC Med Res Methodol.*  
668 2020;20: 7.  
669 doi: [10.1186/s12874-020-0897-3](https://doi.org/10.1186/s12874-020-0897-3) • [Google Scholar](#).
- 670 41. Valizadeh A, Moassefi M, Nakhostin-Ansari A, Hosseini Asl SH, Saghab Torbati M, Aghajani R et  
671 al. Abstract screening using the automated tool Rayyan: results of effectiveness in three  
672 diagnostic test accuracy systematic reviews. *BMC Med Res Methodol.* 2022;22: 160.  
673 doi: [10.1186/s12874-022-01631-8](https://doi.org/10.1186/s12874-022-01631-8) • [Google Scholar](#).
- 674 42. Noyes J, Lewin S; 2011. Chapter 5. Extracting qualitative evidence. In: Noyes J, Booth A, Hannes  
675 K, Harden A, Harris J et al., editors. Supplementary guidance for inclusion of qualitative research  
676 in cochrane systematic reviews of interventions. version 1 [Updated August 2011]. Cochrane:  
677 Collaboration Qualitative Methods Group. [Cited 02 July 2022]. Available from:  
678 <http://cqrmg.cochrane.org/supplemental-handbook-guidance>.
- 679 43. Porritt K, Gomersall J, Lockwood C. JBI's systematic reviews: study selection and critical  
680 appraisal. *Am J Nurs.* 2014;114: 47-52.  
681 doi: [10.1097/01.NAJ.0000450430.97383.64](https://doi.org/10.1097/01.NAJ.0000450430.97383.64) • [Google Scholar](#).
- 682 44. Long HA, French DP, Brooks JM. Optimising the value of the Critical Appraisal Skills Programme,  
683 tool for quality appraisal in qualitative evidence synthesis. *Res Methods Med. Health Sci.*  
684 2020;1: 31-42.  
685 doi: [10.1177/2632084320947559](https://doi.org/10.1177/2632084320947559) • [Google Scholar](#).



- 686 45. Noblit GW, Hare RD. Meta-Ethnogr Synthesizing Qual Stud. 1988. Available from:  
687 <https://uk.sagepub.com/en-gb/eur/meta-ethnography/book2416>;11. sage.
- 688 46. Campbell R, Pound P, Morgan M, Daker-White G, Britten N, Pill R et al. Evaluating meta-  
689 ethnography: systematic analysis and synthesis of qualitative research. Health Technol Assess.  
690 2011 Dec;15: 1-164.  
691 doi: [10.3310/hta15430](https://doi.org/10.3310/hta15430) • PubMed: [22176717](https://pubmed.ncbi.nlm.nih.gov/22176717/) • [Google Scholar](#).
- 692 47. Sandelowski M, Barroso J. Creating metasummaries of qualitative findings. Nurs Res. 2003;52:  
693 226-233.  
694 doi: [10.1097/00006199-200307000-00004](https://doi.org/10.1097/00006199-200307000-00004) • [Google Scholar](#).
- 695 48. France EF, Cunningham M, Ring N, Uny I, Duncan EAS, Jepson RG, Maxwell M, Roberts RJ, Turley  
696 RL, Booth A, Britten N, Flemming K, Gallagher I, Garside R, Hannes K, Lewin S, Noblit GW, Pope  
697 C, Thomas J, Vanstone M, Higginbottom GMA, Noyes J. Improving reporting of meta-  
698 ethnography: the eMERGe reporting guidance. BMC Med Res Methodol. 2019 Jan 31;19(1):25.  
699 doi: [10.1186/s12874-018-0600-0](https://doi.org/10.1186/s12874-018-0600-0). PMID: 30709371; PMCID: PMC6359764.
- 700 49. Britten N, Campbell R, Pope C, Donovan J, Morgan M, Pill R. Using meta ethnography to  
701 synthesise qualitative research: a worked example. J Health Serv Res Policy. 2002;7: 209-215.  
702 doi: [10.1258/135581902320432732](https://doi.org/10.1258/135581902320432732) • [Google Scholar](#).
- 703 50. Cahill M, Robinson K, Pettigrew J, Galvin R, Stanley M. Qualitative synthesis: a guide to  
704 conducting a meta-ethnography. Br J Occup Ther. 2018;81: 129-137.  
705 doi: [10.1177/0308022617745016](https://doi.org/10.1177/0308022617745016) • [Google Scholar](#).
- 706 51. Alcántara Porcuna V, Rodríguez-Martín B. Parents' and teachers' perceptions of physical activity  
707 in schools: A meta-ethnography. J Sch Nurs. 2022;38: 98-109.  
708 doi: [10.1177/1059840520972005](https://doi.org/10.1177/1059840520972005) • [Google Scholar](#).
- 709 52. Bell Z, Scott S, Visram S, Rankin J, Bamba C, Heslehurst N. Experiences and perceptions of  
710 nutritional health and wellbeing amongst food insecure women in Europe: A qualitative meta-  
711 ethnography. Soc Sci Med. 2022;311: 115313.  
712 doi: [10.1016/j.socscimed.2022.115313](https://doi.org/10.1016/j.socscimed.2022.115313) • [Google Scholar](#).

- 713 53. Elmir R, Schmied V, Wilkes L, Jackson D. Women's perceptions and experiences of a traumatic  
714 birth: A meta-ethnography. *J Adv Nurs*. 2010;66: 2142-2153.  
715 doi: [10.1111/j.1365-2648.2010.05391.x](https://doi.org/10.1111/j.1365-2648.2010.05391.x) • [Google Scholar](#).
- 716 54. Lyons S, Currie S, Peters S, Lavender T, Smith DM. The perceptions and experiences of women  
717 with a body mass index  $\geq 30$  kg m<sup>2</sup> who breastfeed: A meta-synthesis. *Matern Child Nutr*. 2019  
718 Jul;15: e12813. doi: [10.1111/mcn.12813](https://doi.org/10.1111/mcn.12813). [Epub 2019 Apr 26].PubMed: [30901509](https://pubmed.ncbi.nlm.nih.gov/30901509/) • PubMed  
719 Central: [PMC6618145](https://pubmed.ncbi.nlm.nih.gov/PMC6618145/). [Google Scholar](#).
- 720 55. Toye F, Seers K, Allcock N, Briggs M, Carr E, Barker K. Meta-ethnography 25 years on: challenges  
721 and insights for synthesising a large number of qualitative studies. *BMC Med Res Methodol*.  
722 2014;14: 80.  
723 doi: [10.1186/1471-2288-14-80](https://doi.org/10.1186/1471-2288-14-80) • [Google Scholar](#).
- 724 56. Atkins S, Lewin S, Smith H, Engel M, Fretheim A, Volmink J. Conducting a meta-ethnography of  
725 qualitative literature: lessons learnt. *BMC Med Res Methodol*. 2008;8: 21.  
726 doi: [10.1186/1471-2288-8-21](https://doi.org/10.1186/1471-2288-8-21) • [Google Scholar](#).
- 727 57. Malterud K, Siersma VD, Guassora AD. Sample size in qualitative interview studies: guided by  
728 information power. *Qual Health Res*. 2016;26: 1753-1760.  
729 doi: [10.1177/1049732315617444](https://doi.org/10.1177/1049732315617444) • [Google Scholar](#).
- 730 59. McHugh ML. Interrater reliability: the kappa statistic. *Biochem Med*. 2012;22: 276-282.  
731 doi: [10.11613/BM.2012.031](https://doi.org/10.11613/BM.2012.031) • [Google Scholar](#).
- 732 58. Cohen J. Weighted kappa: nominal scale agreement with provision for scaled disagreement or  
733 partial credit. *Psychol Bull*. 1968 Oct;70: 213-220.  
734 doi: [10.1037/h0026256](https://doi.org/10.1037/h0026256) • PubMed: [19673146](https://pubmed.ncbi.nlm.nih.gov/19673146/) • [Google Scholar](#).
- 735 60. Park CU, Kim HJ. Measurement of inter-rater reliability in systematic review. *Hanyang Med Rev*.  
736 2015;35: 44-49.  
737 doi: [10.7599/hmr.2015.35.1.44](https://doi.org/10.7599/hmr.2015.35.1.44) • [Google Scholar](#).
- 738 61. Devillé WL, Buntinx F, Bouter LM, Montori VM, De Vet HC, Van der Windt DA et al. Conducting  
739 systematic reviews of diagnostic studies: didactic guidelines. *BMC Med Res Methodol*. 2002;2: 9.  
740 doi: [10.1186/1471-2288-2-9](https://doi.org/10.1186/1471-2288-2-9) • [Google Scholar](#).

- 741 62. Adhiambo HF, Ngayo M, Kwena Z. Preferences for accessing sexual and reproductive health  
742 services among adolescents and young adults living with HIV/AIDS in Western Kenya: A  
743 qualitative study. PLOS ONE. 2022;17: e0277467.  
744 doi: [10.1371/journal.pone.0277467](https://doi.org/10.1371/journal.pone.0277467) • [Google Scholar](#).
- 745 63. McCarraher DR, Packer C, Mercer S, Dennis A, Banda H, Nyambe N et al. Adolescents living with  
746 HIV in the Copperbelt Province of Zambia: their reproductive health needs and  
747 experiences. PLOS ONE. 2018;13: e0197853.  
748 doi: [10.1371/journal.pone.0197853](https://doi.org/10.1371/journal.pone.0197853) • [Google Scholar](#).
- 749 64. Twitty TD, Hitch AE, Marais L, Sales JM, Sharp C, Cloete J et al. Pregnancy and STI/HIV  
750 prevention intervention preferences of South African adolescent girls: findings from a cultural  
751 consensus modelling qualitative study. Cult Health Sex. 2024 Feb;26: 191-207.  
752 doi: [10.1080/13691058.2023.2194357](https://doi.org/10.1080/13691058.2023.2194357). [Epub 2023 Apr 6].  
753 PubMed: [37022107](https://pubmed.ncbi.nlm.nih.gov/37022107/) • [Google Scholar](#).
- 754 65. Olukoya AA. Provision of reproductive health services for adolescents--report of a study in two  
755 Local Government areas (LGAs) of Nigeria. Early Child Dev Care. 1996;120: 95-117.  
756 doi: [10.1080/0300443961200108](https://doi.org/10.1080/0300443961200108) • [Google Scholar](#).
- 757 66. Smith P, Marcus R, Bennie T, Nkala B, Nchabeleng M, Latka MH et al. What do South African  
758 adolescents want in a sexual health service? Evidence from the South African Studies on HIV in  
759 Adolescents (SASHA) project. S Afr Med J. 2018;108: 677-681.  
760 doi: [10.7196/SAMJ.2018.v108i8.13013](https://doi.org/10.7196/SAMJ.2018.v108i8.13013) • [Google Scholar](#).
- 761 67. Vujovic M, Struthers H, Meyersfeld S, Dlamini K, Mabizela N. Addressing the sexual and  
762 reproductive health needs of young adolescents living with HIV in South Africa. Child Youth Serv  
763 Rev. 2014;45: 122-128.  
764 doi: [10.1016/j.childyouth.2014.03.028](https://doi.org/10.1016/j.childyouth.2014.03.028) • [Google Scholar](#).
- 765 68. Atuyambe LM, Kibira SP, Bukenya J, Muhumuza C, Apolot RR, Mulogo E. Understanding sexual  
766 and reproductive health needs of adolescents: evidence from a formative evaluation in Wakiso  
767 District, Uganda. Reprod Health. 2015;12: 35.  
768 doi: [10.1186/s12978-015-0026-7](https://doi.org/10.1186/s12978-015-0026-7) • [Google Scholar](#).

- 769 69. Mutea L, Ontiri S, Kadiri F, Michielesen K, Gichangi P. Access to information and use of  
770 adolescent sexual reproductive health services: qualitative exploration of barriers and  
771 facilitators in Kisumu and Kakamega, Kenya. PLOS ONE. 2020;15: e0241985.  
772 doi: [10.1371/journal.pone.0241985](https://doi.org/10.1371/journal.pone.0241985) • [Google Scholar](#).
- 773 70. Schriver B, Meagley K, Norris S, Geary R, Stein AD. Young people's perceptions of youth-oriented  
774 health services in urban Soweto, South Africa: a qualitative investigation. BMC Health Serv Res.  
775 2014;14: 625.  
776 doi: [10.1186/s12913-014-0625-y](https://doi.org/10.1186/s12913-014-0625-y) • [Google Scholar](#).
- 777 71. Tuhebwe D, Babirye S, Ssendagire S, Ssenooba F. The extent to which the design of available  
778 reproductive health interventions fit the reproductive health needs of adolescents living in  
779 urban poor settings of Kisenyi, Kampala, Uganda. BMC Public Health. 2021;21: 933.  
780 doi: [10.1186/s12889-021-10933-3](https://doi.org/10.1186/s12889-021-10933-3) • [Google Scholar](#).
- 781 72. Mburu G, Hodgson I, Teltschik A, Ram M, Haamujompa C, Bajpai D et al. Rights-based services  
782 for adolescents living with HIV: adolescent self-efficacy and implications for health systems in  
783 Zambia. Reprod Health Matters. 2013;21: 176-185.  
784 doi: [10.1016/S0968-8080\(13\)41701-9](https://doi.org/10.1016/S0968-8080(13)41701-9) • [Google Scholar](#).
- 785 73. Adams L, Crowley T. Adolescent human immunodeficiency virus self-management: needs of  
786 adolescents in the Eastern Cape. Afr J Prim Health Care Fam Med. 2021;13: e1-e9.  
787 doi: [10.4102/phcfm.v13i1.2756](https://doi.org/10.4102/phcfm.v13i1.2756) • [Google Scholar](#).
- 788 74. Hodgson I, Ross J, Haamujompa C, Gitau-Mburu D. Living as an adolescent with HIV in Zambia—  
789 lived experiences, sexual health and reproductive needs. AIDS Care. 2012;24: 1204-1210.  
790 doi: [10.1080/09540121.2012.658755](https://doi.org/10.1080/09540121.2012.658755) • [Google Scholar](#).
- 791 75. Lince-Deroche N, Hargey A, Holt K, Shochet T. Accessing sexual and reproductive health  
792 information and services: A mixed methods study of young women's needs and experiences in  
793 Soweto, South Africa. Afr J Reprod Health. 2015;19: 73-81.  
794 [Google Scholar](#).
- 795 76. Godia PM, Olenja JM, Hofman JJ, Van Den Broek N. Young people's perception of sexual and  
796 reproductive health services in Kenya. BMC Health Serv Res. 2014;14: 172.  
797 doi: [10.1186/1472-6963-14-172](https://doi.org/10.1186/1472-6963-14-172) • [Google Scholar](#).

- 798 77. Simuyaba M, Hensen B, Phiri M, Mwansa C, Mwenge L, Kabumbu M et al. Engaging young  
799 people in the design of a sexual reproductive health intervention: lessons learnt from the Yathu  
800 Yathu ("For us, by us") formative study in Zambia. *BMC Health Serv Res.* 2021 Jul 29;21: 753.  
801 doi: [10.1186/s12913-021-06696-7](https://doi.org/10.1186/s12913-021-06696-7) • PubMed: [34325696](https://pubmed.ncbi.nlm.nih.gov/34325696/) • PubMed Central: [PMC8320161](https://pubmed.ncbi.nlm.nih.gov/PMC8320161/).  
802 [Google Scholar](#).
- 803 78. Olukoya AA. Provision of Reproductive Health Services for Adolescents--Report of a Study in  
804 Two Local Government Areas (LGAs) of Nigeria. *Early Child Development and Care.* 1996 Jan  
805 1;120(1):95-117.
- 806 79. Self A, Chipokosa S, Misomali A, Aung T, Harvey SA, Chimchere M et al. Youth accessing  
807 reproductive health services in Malawi: drivers, barriers, and suggestions from the perspectives  
808 of youth and parents. *Reprod Health.* 2018 Jun 19;15: 108.  
809 doi: [10.1186/s12978-018-0549-9](https://doi.org/10.1186/s12978-018-0549-9) • PubMed: [29921282](https://pubmed.ncbi.nlm.nih.gov/29921282/) • PubMed Central: [PMC6008927](https://pubmed.ncbi.nlm.nih.gov/PMC6008927/).  
810 [Google Scholar](#).
- 811 80. Odo AN, Samuel ES, Nwagu EN, Nnamani PO, Atama CS. Sexual and reproductive health services  
812 (SRHS) for adolescents in Enugu state, Nigeria: a mixed methods approach. *BMC Health Serv*  
813 *Res.* 2018;18: 92.  
814 doi: [10.1186/s12913-017-2779-x](https://doi.org/10.1186/s12913-017-2779-x) • [Google Scholar](#).
- 815 81. Mmari KN, Magnani RJ. Does making clinic-based reproductive health services more youth-  
816 friendly increase service use by adolescents? Evidence from Lusaka, Zambia. *J Adolesc Health.*  
817 2003;33: 259-270.  
818 doi: [10.1016/s1054-139x\(03\)00062-4](https://doi.org/10.1016/s1054-139x(03)00062-4) • [Google Scholar](#).
- 819 82. Kimo K, Makuria K. 'Adolescents' reproductive health problems, service preferences, and  
820 accessibility. *Pak J Psychol Res.* 2017;32: 407-427.
- 821 83. Mosavi SA, Babazadeh R, Najmabadi KM, Shariati M. Assessing Iranian adolescent girls' needs  
822 for sexual and reproductive health information. *J Adolesc Health.* 2014;55: 107-113.  
823 doi: [10.1016/j.jadohealth.2013.11.029](https://doi.org/10.1016/j.jadohealth.2013.11.029) • [Google Scholar](#).
- 824 84. Starrs AM, Ezeh AC, Barker G, Basu A, Bertrand JT, Blum R et al. Accelerate progress-sexual and  
825 reproductive health and rights for all: report of the Guttmacher-Lancet Commission. *Lancet.*  
826 2018 Jun 30;391: 2642-2692.

- 827 doi: [10.1016/S0140-6736\(18\)30293-9](https://doi.org/10.1016/S0140-6736(18)30293-9). [Epub 2018 May 9].
- 828 PubMed: [29753597](https://pubmed.ncbi.nlm.nih.gov/29753597/) • [Google Scholar](#).
- 829 85. Reid Chassiakos YL, Radesky J, Christakis D, Moreno MA, Cross C, COUNCIL ON  
830 COMMUNICATIONS AND MEDIA. Children and adolescents and digital media. *Pediatrics*. 2016  
831 Nov;138: e20162593.
- 832 doi: [10.1542/peds.2016-2593](https://doi.org/10.1542/peds.2016-2593) • PubMed: [27940795](https://pubmed.ncbi.nlm.nih.gov/27940795/) • [Google Scholar](#).
- 833 86. Pringle J, Mills KL, McAteer J, Jepson R, Hogg E, Anand N et al. The physiology of adolescent  
834 sexual behaviour: A systematic review. *Cogent Soc Sci*. 2017;3: 1368858.
- 835 doi: [10.1080/23311886.2017.1368858](https://doi.org/10.1080/23311886.2017.1368858) • [Google Scholar](#).
- 836 88. Denno DM, Hoopes AJ, Chandra-Mouli V. Providing adolescent-friendly reproductive health  
837 services through public health facilities in resource-constrained settings: a review of the  
838 evidence from low- and middle-income countries. *J Adolesc Health*. 2020;66: S7-S17.
- 839 87. Gbadamosi IT. Ethnobotanical survey of plants used for the treatment and management of  
840 sexually transmitted infections in Ibadan, Nigeria. *Ethnobot Res Appl*. 2014;12: 659-669.
- 841 Available from: <https://ethnobotanyjournal.org/index.php/era/article/view/945>.
- 842 doi: [10.17348/era.12.0.659-669](https://doi.org/10.17348/era.12.0.659-669) • [Google Scholar](#).
- 843 89. Mmari K, Lantos H, Brahmabhatt H, Delany-Moretlwe S, Lou C, Acharya R et al. How adolescents  
844 perceive their communities: a qualitative study that explores the relationship between health  
845 and the physical environment. *BMC Public Health*. 2014;14: 349.
- 846 doi: [10.1186/1471-2458-14-349](https://doi.org/10.1186/1471-2458-14-349) • [Google Scholar](#).
- 847 90. Zenebe GA, Ewunie TM, Belay MM, Abose AM. Quality of adolescent and youth-friendly sexual  
848 and reproductive health services and associated factors in Ethiopia: a systematic review and  
849 meta-analysis. *Front Public Health*. 2023 Jul 12;11:1191676. doi: [10.3389/fpubh.2023.1191676](https://doi.org/10.3389/fpubh.2023.1191676).  
850 PMID: 37501947; PMCID: PMC10369062
- 851 91. Chandra-Mouli V, Plesons M, Hadi S, Baig Q, Lang I. Building support for adolescent sexuality  
852 and reproductive health education and responding to resistance in conservative contexts: cases  
853 from Pakistan. *Glob Health Sci Pract*. 2018 Mar 30;6: 128-136.
- 854 doi: [10.9745/GHSP-D-17-00285](https://doi.org/10.9745/GHSP-D-17-00285) • PubMed: [29444802](https://pubmed.ncbi.nlm.nih.gov/29444802/) • PubMed Central: [PMC5878066](https://pubmed.ncbi.nlm.nih.gov/PMC5878066/).
- 855 [Google Scholar](#).

- 856 92. United Nations Population Fund. The power of 1.8 billion: adolescents, youth and the  
857 transformation of the future. [Cited 15 January 2024]. Available from:  
858 [https://www.unfpa.org/sites/default/files/pub-pdf/EN-SWOP14-Report\\_FINAL-web.pdf](https://www.unfpa.org/sites/default/files/pub-pdf/EN-SWOP14-Report_FINAL-web.pdf); 2014.
- 859 93. Chandra-Mouli V, Lane C, Wong S. What does not work in adolescent sexual and reproductive  
860 health: a review of evidence on interventions commonly accepted as best practices. *Glob Health*  
861 *Sci Pract*. 2015 Aug 31;3: 333-340.  
862 doi: [10.9745/GHSP-D-15-00126](https://doi.org/10.9745/GHSP-D-15-00126) • PubMed: [26374795](https://pubmed.ncbi.nlm.nih.gov/26374795/) • PubMed Central: [PMC4570008](https://pubmed.ncbi.nlm.nih.gov/PMC4570008/).  
863 [Google Scholar](#).
- 864 94. Denno DM, Chandra-Mouli V, Osman M. Reaching youth with out-of-facility HIV and  
865 reproductive health services: a systematic review. *J Adolesc Health*. 2012;51: 106-121.  
866 doi: [10.1016/j.jadohealth.2012.01.004](https://doi.org/10.1016/j.jadohealth.2012.01.004) • [Google Scholar](#).
- 867 95. Akinwale, Oladayo Damilola, Bello, Cecilia Bukola, Akpor, Oluwaseyi Abiodun, Elemile, Mayowa  
868 Grace. Evaluation of adolescent/youth-friendly sexual and reproductive health services: A 7-year  
869 systematic review from January 2016 to April 2022. *J Integr Nurs*. Oct-Dec 2022;4: 177-192.  
870 doi: [10.4103/jin.jin\\_79\\_22](https://doi.org/10.4103/jin.jin_79_22) • [Google Scholar](#).
- 871 96. Envuladu EA, Massar K, de Wit J. Adolescent sexual and reproductive health care service  
872 availability and delivery in public health facilities of plateau state Nigeria. *Int J Environ Res Public*  
873 *Health*. 2021;18: 1369.  
874 doi: [10.3390/ijerph18041369](https://doi.org/10.3390/ijerph18041369) • [Google Scholar](#).
- 875 97. Khadr SN, Jones KG, Mann S, Hale DR, Johnson AM, Viner RM et al. Investigating the relationship  
876 between substance use and sexual behaviour in young people in Britain: findings from a  
877 national probability survey. *BMJ Open*. 2016;6: e011961.  
878 doi: [10.1136/bmjopen-2016-011961](https://doi.org/10.1136/bmjopen-2016-011961) • [Google Scholar](#).
- 879 98. Manlove J, Fish H, Moore KA. Programs to improve adolescent sexual and reproductive health in  
880 the US: a review of the evidence. *Adolesc Health Med Ther*. 2015 Apr 7;6: 47-79.  
881 doi: [10.2147/AHMT.S48054](https://doi.org/10.2147/AHMT.S48054) • PubMed: [25897271](https://pubmed.ncbi.nlm.nih.gov/25897271/) • PubMed Central: [PMC4396579](https://pubmed.ncbi.nlm.nih.gov/PMC4396579/).  
882 [Google Scholar](#).
- 883 99. Department of Health and Social Care. 'You're Welcome': establishing youth-friendly health and  
884 care services [online]. Available from: <https://www.gov.uk/government/publications>

- 885 [/establishing-youth-friendly-health-and-care-services/youre-welcome-establishing-youth-](#)  
886 [friendly-health-and-care-services](#); 2023.
- 887 100.García-Bello LA, Heredia-Pi IB, Zavala-Arciniega L, Paz-Ballesteros W, Velázquez-Viamonte A,  
888 Serván-Mori E. E. Care friendliness in adolescent sexual and reproductive health services in  
889 Mexico and a characterisation of their clients. *Int J Health Plann Manage*. 2022 Dec;37 Suppl 1:  
890 204-219.  
891 doi: [10.1002/hpm.3512](https://doi.org/10.1002/hpm.3512). [Epub 2022 Jun 6]. PubMed: [35661412](#) • [Google Scholar](#).
- 892 101.Ranjan S, Nair AR. Approaches and strategies for effective implementation of Life Skills  
893 Education. *Int J Life Skills Educ*. 2015;1: 89-110.
- 894 102.Ubisi L. Analysing the hegemonic discourses on comprehensive sexuality education in South  
895 African schools. *J Educ. University of KwaZulu-Natal*. 2020;(81): 118-135.  
896 doi: [10.17159/2520-9868/i81a07](https://doi.org/10.17159/2520-9868/i81a07) • [Google Scholar](#).
- 897 103.Mbeba RM, Mkuye MS, Magembe GE, Yotham WL, Mellah AO, Mkuwa SB. Barriers to sexual  
898 reproductive health services and rights among young people in Mtwara District, Tanzania: a  
899 qualitative study. *Pan Afr Med J*. 2012;13 Suppl 1 Suppl 1(Suppl 1):13. [Epub 2012 Dec 26]: 13.  
900 PubMed: [23467684](#) • PubMed Central: [PMC3589247](#).  
901 [Google Scholar](#).
- 902 104.Critical Appraisal Skills Programme. CASP qualitative studies checklist [online]. [Cited 07 July  
903 2022]. Available from: <https://casp-uk.net/casp-tools-checklists/>; 2018.
- 904 105.Hujo K, Carter M. Transformative change for children and youth in the context of the 2030  
905 agenda for sustainable development. Available from:  
906 <https://cdn.unrisd.org/assets/library/papers/pdf-files/wp-2019-2-hujo-carter%20.pdf>; 2019.
- 907 106.Markham CM, Lormand D, Gloppen KM, Peskin MF, Flores B, Low B et al. Connectedness as a  
908 predictor of sexual and reproductive health outcomes for youth. *J Adolesc Health*. 2010;46(3)  
909 Suppl: S23-S41.  
910 doi: [10.1016/j.jadohealth.2009.11.214](https://doi.org/10.1016/j.jadohealth.2009.11.214) • [Google Scholar](#).
- 911 107.Awuah V, Apiung G, Konlaan B. Utilization of youth friendly health services and associated  
912 factors: A community-based analytical cross-sectional study among young people in the tamale.



913 [Cited 08 September 2023]. Available from: [https://assets.researchsquare.com/files/rs-](https://assets.researchsquare.com/files/rs-1609739/v1/2f0d9237-c305-41d7-b6f3-d471fb7cb5dc.pdf?c=1658835871)  
914 [1609739/v1/2f0d9237-c305-41d7-b6f3-d471fb7cb5dc.pdf?c=1658835871](https://assets.researchsquare.com/files/rs-1609739/v1/2f0d9237-c305-41d7-b6f3-d471fb7cb5dc.pdf?c=1658835871); 2022. Metropolis.

915 108. West, Robert, Michie, Susan. A brief introduction to the COM-B Model of behaviour and the  
916 PRIME Theory of motivation. Qeios. 2020.  
917 doi: [10.32388/WW04E6](https://doi.org/10.32388/WW04E6) • [Google Scholar](https://scholar.google.com/).

918 109 McDonagh LK, Saunders JM, Cassell J, Curtis T, Bastaki H, Hartney T, Rait G. Application of the  
919 COM-B model to barriers and facilitators to chlamydia testing in general practice for young  
920 people and primary care practitioners: a systematic review. Implementation Science. 2018  
921 Dec;13(1):1-9. Doi: <https://doi.org/10.1186/s13012-018-0821-y>

922 110. James G. Education and sexuality: towards addressing adolescents' reproductive health needs in  
923 Nigeria. Curr Res J Soc Sci. 2012;4: 285-293.

924

925

## 926 **Supporting documentation**

927 S1 File. This is the S1 File List of countries in sub-Saharan Africa.

928 S2 File. This is the S1 File Search histories.

929 S3 Table. This is the S3 Table Data extraction summary on youth's needs and preferences  
930 regarding SRHS in sub-Saharan Africa.

931 S4 Table. This is the S4 Table CASP appraisal of included papers on the needs and  
932 preferences of youths regarding sexual and reproductive health services in sub-Saharan  
933 Africa.
