# Supplementary material for: The Sexual and Reproductive Health needs and preferences of youths in sub-Saharan Africa: A meta-synthesis
Source: bioRxiv or medRxiv preprint supplement (doi:10.1101/2024.03.08.24303966), 2024-06-27
Supplement: Supplementary file [file media-1.zip]

## Data extraction summary on youth's needs and preferences regarding SRHS in sub-Saharan Africa

| S / N | Title                                                                                                                                                                                    | Authors/<br>Publication date                                                                  | Country of study | Name of Journal/impact factor                        | Context         | Design                                                      | Target adolescent population                        | Method of data collection    | Emergent themes                                                                                                                                                                                            |
|-------|------------------------------------------------------------------------------------------------------------------------------------------------------------------------------------------|-----------------------------------------------------------------------------------------------|------------------|------------------------------------------------------|-----------------|-------------------------------------------------------------|-----------------------------------------------------|------------------------------|------------------------------------------------------------------------------------------------------------------------------------------------------------------------------------------------------------|
| 1.    | Addressing the sexual and reproductive health needs of young adolescents living with HIV in South Africa                                                                                 | Vujovic, M., Struthers, H., Meyersfeld, S., Dlamini, K. and Mabizela, N (2014)                | South Africa     | Children and youth services review (ELSEVIER)/ 2.519 | facility based  | Qualitative (no mention of the specific qualitative design) | Male and female living with HIV (ALWHIV) 10-14years | Focus group discussion (FGD) | 1. Service provision<br>2. Information, education, and communication<br>3. Risk perception and management                                                                                                  |
| 2.    | The extent to which the design of available reproductive health interventions fit the reproductive health needs of adolescents living in urban poor settings of Kisenyi, Kampala, Uganda | Tuhebwe, D., Babirye, S., Ssendagire, S. and Ssengooba, F. (2021)                             | Uganda           | BMC Public health/ 4.135 (2-year impact)             | Community based | Qualitative (specific qualitative design not mentioned)     | Male and female aged 15-19years                     | FGD                          | 1. Sexual reproductive health (SRH) needs<br>2. Social needs.<br>3. Extent of fit between intervention design features and priority reproductive health needs of the adolescents                           |
| 3.    | What do South African adolescents want in a sexual health service? Evidence from the South African Studies on HIV in Adolescents (SASHA) project                                         | Smith, P., Marcus, R., Bennie, T., Nkala, B., Nchabeleng, M., Latka, M.H., Gray, G., Wallace, | South Africa     | South African Medical Journal (SAMJ)/1.500           | community based | Qualitative (specific qualitative design not mentioned)     | Male and female aged 12-17years                     | FGD                          | 1. The need for the provision of dedicated adolescent health services.<br>2. Tailored services with developmentally appropriate information.<br>3. Emphasis on the desire for confidentiality and trusting |

|  |  |                                  |  |  |  |  |  |  |  |                                                                                      |
|--|--|----------------------------------|--|--|--|--|--|--|--|--------------------------------------------------------------------------------------|
|  |  | M. and<br>Bekker, L.G.<br>(2018) |  |  |  |  |  |  |  | relationships with health-care staff.<br>4. Availability of services and information |
|--|--|----------------------------------|--|--|--|--|--|--|--|--------------------------------------------------------------------------------------|

| S/<br>N | Tittle                                                                                                                                                            | Authors/<br>publication date                                                                                                                             | Country<br>of study | Name of<br>Journal/i<br>mpact<br>factor                       | Context              | Design                                                         | Target<br>adolescent<br>popula         | Method<br>of data<br>collectio<br>n                     | Themes                                                                                                                                                                                                                                    |
|---------|-------------------------------------------------------------------------------------------------------------------------------------------------------------------|----------------------------------------------------------------------------------------------------------------------------------------------------------|---------------------|---------------------------------------------------------------|----------------------|----------------------------------------------------------------|----------------------------------------|---------------------------------------------------------|-------------------------------------------------------------------------------------------------------------------------------------------------------------------------------------------------------------------------------------------|
| 4.      | Engaging young people in the design of a sexual reproductive health intervention: Lessons learnt from the Yathu Yathu (“For us, by us”) formative study in Zambia | Simuyaba, M., Hensen, B., Phiri, M., Mwansa, C., Mwenge, L., Kabumbu, M., Belemu, S., Shanaube, K., Schaap, A., Floyd, S. and Fidler, S. (2021)          | Zambia              | BMC Health Services Research (ELSEVIER)/2.908 (2-year impact) | Communit<br>y based  | Participatory qualitative research                             | Male and female, 15-24 years           | FGD, observati<br>on and In-depth interview<br>s (IDIs) | 1. Community mapping: context of adolescents and young people (AYP)’s SRH<br>2. Primary discussion<br>3. Consolidation of AYP’s views                                                                                                     |
| 5.      | Youth accessing reproductive health services in Malawi: drivers, barriers, and suggestions from the perspectives of youth and parents.                            | , Self A., Chipokosa, S., Misomali, A., Aung, T., Harvey, S.A., Chimchere, M., Chilembwe, J., Park, L., Chalimba, C., Monjeza, E. and Kachale, F. (2018) | Malawi              | Reproduct<br>ive Health (BMC) /3.355 (2-year impact)          | Facility based       | Qualitative (specific qualitative design not mentioned)        | Male and female aged 15-24years        | FGD                                                     | 1. Drivers of youth accessing family planning services<br>2. Barriers’ youth face accessing family planning services Misconceptions and perceived side-effects<br>3. Suggestions from participants for improving family planning services |
| 6.      | Young people’s perceptions of youth-oriented health services in urban Soweto, South Africa: a qualitative investigation                                           | Schriver, B., Meagley, K., Norris, S., Geary, R. and Stein, A.D. (2014)                                                                                  | South Africa        | Health Services Research (BMC)2.908 (2-year impact)           | communit<br>y based. | Ground theory as described by Borgatti and Strauss and Corbin. | Male and female youths aged 21-22years | IDIs                                                    | 1. Perception of current health services.<br>2. Knowledge of youth friendly services.<br>3. Attitudes toward alternative health services.                                                                                                 |

| S/<br>N | Title                                                                                                                                                               | Authors/<br>publication<br>date                                            | Country of<br>study | Name of<br>Journal/impact<br>factor                                      | Context          | Design                                                   | Target<br>adolescent<br>population                                                          | Method<br>of data<br>collectio<br>n           | Themes                                                                                                                                                                                                                     |
|---------|---------------------------------------------------------------------------------------------------------------------------------------------------------------------|----------------------------------------------------------------------------|---------------------|--------------------------------------------------------------------------|------------------|----------------------------------------------------------|---------------------------------------------------------------------------------------------|-----------------------------------------------|----------------------------------------------------------------------------------------------------------------------------------------------------------------------------------------------------------------------------|
| 7.      | Provision of Reproductive Health Services for Adolescents -- Report of a Study in Two Local Government Areas (LGAs) of Nigeria                                      | Olukoya, A. (1996)                                                         | Nigeria             | Early Child Development and Care (Taylor & Francis)/1.206(2-year impact) | Facility based   | Mixed study (Specific qualitative design not mentioned ) | Out of school and in-school Male and female adolescents. Authors stated “less than 15years” | FGD and direct observation                    | 1. Perceptions of the health problems of adolescents.<br>2. Help-seeking behaviour.                                                                                                                                        |
| 8.      | Sexual and reproductive health services (SRHS) for adolescents in Enugu state, Nigeria: a mixed methods approach.                                                   | Odo, A.N., Samuel, E.S., Nwagu, E.N., Nnamani, P.O. and Atama, C.S. (2018) | Nigeria             | Health Services Research (BMC)2.908 (2-year impact)                      | Community based  | Mixed (Specific qualitative design not mentioned )       | Male and female aged 12-22years                                                             | Interview (type-unclear) and FGD              | 1. Availability of SRHS for Adolescents.<br>2. Accessibility of SRHS to adolescents.                                                                                                                                       |
| 9.      | Access to information and use of adolescent sexual reproductive health services: Qualitative exploration of barriers and facilitators in Kisumu and Kakamega, Kenya | Mutea, L., Ontiri, S., Kadiri, F., Michielesen, K. and Gichangi, P.(2020)  | kenya               | PLOS ONE (No impact factor documentation on the journal's home page)     | Community based. | Qualitative (specific qualitative design not mentioned ) | Male and female adolescents aged 15-19 years                                                | FGD, IDIs and Key Informant interviews (KIIs) | 1. Common issues perceived to affect the health of adolescents in the community.<br>2. Barriers to access and use of SRH information and services by adolescents.<br>3. Facilitators to access and use of ASRH information |

[illegible]

| S/<br>N | Title                                                                                                                                       | Authors/<br>publication date                                                                                                                     | Country<br>of study | Name of<br>Journal/im<br>pact factor                | Context         | Design                                                  | Target<br>adolescent<br>population          | Method of<br>data<br>collection     | Themes                                                                                                                                                                                        |
|---------|---------------------------------------------------------------------------------------------------------------------------------------------|--------------------------------------------------------------------------------------------------------------------------------------------------|---------------------|-----------------------------------------------------|-----------------|---------------------------------------------------------|---------------------------------------------|-------------------------------------|-----------------------------------------------------------------------------------------------------------------------------------------------------------------------------------------------|
| 10      | Does Making Clinic-based Reproductive Health Services More Youth-friendly Increase Service Use by Adolescents? Evidence From Lusaka, Zambia | Mmari, K.N. and Magnani, R.J. (2003)                                                                                                             | Zambia              | Journal of Adolescent Health (ELSEVIER)/7.83        | Facility based  | Mixed study (Specific qualitative design not mentioned) | Male and female aged 15-24years.            | FGDs and interviews                 | 1. Youth-Friendliness of Health Service.                                                                                                                                                      |
| 11.     | Adolescents living with HIV in the Copperbelt Province of Zambia: Their reproductive health needs and experiences.                          | McCarraher, D.R., Packer, C., Mercer, S., Dennis, A., Banda, H., Nyambe, N., Stalter, R.M., Mwansa, J.K., Katayamoyo, P. and Denison, J.A (2018) | Zambia              | PLOS ONE                                            | Facility based  | Mixed (Specific qualitative design not mentioned)       | Male and female aged 15–18years             | IDIs                                | 1. Sexual experiences including forced sex.<br>2. Sex partner age and HIV Disclosure.<br>3. Contraceptive use.<br>4. Fertility desires and prevention of mother-to-child transmission of HIV. |
| 12.     | Rights-based services for adolescents living with HIV: adolescent self-efficacy and implications for health systems in Zambia               | Mburu, G., Hodgson, I., Teltschik, A., Ram, M., Haamujompa, C., Bajpai, D. and Mutali (2013)                                                     | Zambia              | Reproductive Health Matters (Taylor & Francis)5.732 | Facility based. | Qualitative (specific qualitative design not mentioned) | Male and female adolescents aged 10-19years | Semi-structured interviews and FGDs | 1. A sense of rights, entitlement, and expectation.<br>2. Expressing unmet need.                                                                                                              |

| <b>S/<br/>N</b> | <b>Title</b>                                                                                                                                            | <b>Authors/<br/>publication<br/>date</b>                          | <b>Countr<br/>y of<br/>study</b> | <b>Name of<br/>Journal/impact<br/>factor</b>                                                                         | <b>Context</b> | <b>Design</b>                                             | <b>Target<br/>adolescent<br/>population</b> | <b>Method of<br/>data<br/>collection</b> | <b>Themes</b>                                                                                                                                                                 |
|-----------------|---------------------------------------------------------------------------------------------------------------------------------------------------------|-------------------------------------------------------------------|----------------------------------|----------------------------------------------------------------------------------------------------------------------|----------------|-----------------------------------------------------------|---------------------------------------------|------------------------------------------|-------------------------------------------------------------------------------------------------------------------------------------------------------------------------------|
| 13.             | Accessing Sexual and Reproductive Health Information and Services: A Mixed Methods Study of Young Women's Needs and Experiences in Soweto, South Africa | Lince-Deroche, N., Hargey, A., Holt, K. and Shochet, T. (2015)    | South Africa                     | African Journal of Reproductive Health. (It appears, there is no impact factor documentation on the journal website) | Facility based | Mixed (Grounded theory used for the qualitative approach) | Female adolescents 18-24 years              | Semi-structured interviews.              | 1. Contraception: knowledge and access to services<br>2. Abortion services.<br>3. HIV testing and condom Use.<br>4. Gender-based violence.<br>5. Concerns and support systems |
| 14.             | Adolescents' Reproductive Health Problems, Service Preferences, and Accessibility.                                                                      | Kimo, K. and Makuria, K. (2017)                                   | Ethiopia                         | Pakistan Journal of Psychological Research (No impact factor seen)                                                   | Facility based | Mixed (Specific qualitative design not mentioned)         | Male and female adolescents (12-19years)    | FGD                                      | Reproductive health service accessibility (the only qualitative theme).                                                                                                       |
| 15              | Living as an adolescent with HIV in Zambia – lived experiences, sexual health, and reproductive needs.                                                  | Hodgson I, Julia Ross, Choolwe Haamujompa & D. Gitau-Mburu (2012) | Zambia                           | AIDS Care- Psychological and Socio-Medical Aspects of AIDS/HIV (Taylor & Francis) (No impact factor seen)            | Facility based | Qualitative (specific qualitative design not mentioned)   | Male and female adolescents aged 10-19years | semi-structured interviews and FGD       | 1. Informational needs.<br>2. Psychosocial and disclosure needs.<br>3. Sexual and reproductive health (SRH) needs of adolescents.<br>4. Health systems and services capacity. |

| S/<br>N | Tittle                                                                                                                             | Authors/<br>publication<br>date                                                             | Country<br>of study | Name of<br>Journal/<br>impact<br>factor                        | Context         | Design                                                  | Target<br>adolescent<br>population            | Method of<br>data<br>collection                     | Themes                                                                                                                                                                              |
|---------|------------------------------------------------------------------------------------------------------------------------------------|---------------------------------------------------------------------------------------------|---------------------|----------------------------------------------------------------|-----------------|---------------------------------------------------------|-----------------------------------------------|-----------------------------------------------------|-------------------------------------------------------------------------------------------------------------------------------------------------------------------------------------|
| 16      | Young people's perception of sexual and reproductive health services in Kenya                                                      | Godia, P.M., Olenja, J.M., Hofman, J.J. and Van Den Broek, N. (2014)                        | Kenya               | Health Services Research (BMC)2.908 (2-year impact)            | Facility based  | Qualitative (Specific qualitative design not mentioned) | Male and female aged 10–24 years.             | FGDs and semi-structured in-depth interviews (IDIs) | 1. SRH problems faced by young people.<br>2. Addressing the SRH needs of young people.<br>3. Perceptions of existing SRH services.<br>4. Suggestions on how to improve SRH services |
| 17.     | Understanding sexual and reproductive health needs of adolescents: evidence from a formative evaluation in Wakiso district, Uganda | Atuyambe, L.M., Kibira, S.P., Bukenya, J., Muhumuza, C., Apolot, R.R. and Mulogo, E. (2015) | Uganda              | Reproductive Health (BMC) /3.355 (2-year impact)               | Community based | Qualitative (Specific qualitative design not mentioned) | Male and female aged 10-19years               | FGD                                                 | 1. Main adolescent health problems.<br>2. Adolescent SRH needs.<br>3. Health seeking behaviour and attitudes towards services.                                                      |
| 18.     | Adolescent human immunodeficiency virus self-management: Needs of adolescents in the Eastern Cape                                  | Adams, L. and Crowley, T. (2021)                                                            | South Africa        | African Journal of Primary Health Care & Family Medicine /1.04 | Facility based. | qualitative exploratory-descriptive research design     | Male and female adolescents aged 14 -19 years | Semi-structured interview                           | 1. Knowledge of human immunodeficiency virus and sexual reproductive health.<br>2. Self-regulation skills.<br>3. Self-management resources.                                         |
| 19      | Preferences for accessing sexual and reproductive health                                                                           | Adhiambo, H. F, Ngayo, M. and                                                               | Kenya               | PLOS ONE                                                       | Facility based  | Qualitative (Specific qualitative                       | Male and female adolescents                   | IDIs and FGDs                                       | 1. Preferences of venue for receiving SRH services.                                                                                                                                 |



|    |                                                                                                                                                             |                      |              |                                                                                                             |              |                                                         |                                      |                            |                                                                                                                                                 |
|----|-------------------------------------------------------------------------------------------------------------------------------------------------------------|----------------------|--------------|-------------------------------------------------------------------------------------------------------------|--------------|---------------------------------------------------------|--------------------------------------|----------------------------|-------------------------------------------------------------------------------------------------------------------------------------------------|
|    | services among adolescents and young adults living with HIV/ AIDs in Western Kenya: A qualitative study                                                     | Kwena, Z. (2022)     |              |                                                                                                             |              | design not mentioned)                                   | aged 14 -24 years                    |                            | 2. Preferences of qualities of SRH counsellors.                                                                                                 |
| 20 | Pregnancy and STI/HIV prevention intervention preferences of South African adolescent girls: findings from a cultural consensus modelling qualitative study | Twitty et al. (2023) | South Africa | Culture, Health & Sexuality An International Journal for Research, Intervention and Care (Taylor & Francis) | School-based | Qualitative (Specific qualitative design not mentioned) | Females aged between 14 and 17 years | Semi-structured interviews | <ol style="list-style-type: none"><li>1. Intervention content</li><li>2. Intervention delivery format</li><li>3. Intervention setting</li></ol> |
